# Supplementary material for: Sputnik V Effectiveness against Hospitalization with COVID-19 during Omicron Dominance
Source: MDPI journal article supplement (doi:10.3390/vaccines10060938), 2022-06-13
Supplement: s1 [file s1]

## Supplementary materials

# Sputnik V effectiveness against hospitalization with COVID-19 during Omicron dominance

Andrey S. Shkoda<sup>1</sup>, Vladimir A. Gushchin<sup>2,3,\*</sup>, Darya A. Ogarkova<sup>2</sup>, Svetlana V. Stavitskaya<sup>1</sup>, Olga E. Orlova<sup>1</sup>, Nadezhda A. Kuznetsova<sup>2</sup>, Elena N. Keruntu<sup>1</sup>, Andrei A. Pochtovyi<sup>2,3</sup>, Alexander V. Pukhov<sup>1</sup>, Denis A. Kleymenov<sup>2</sup>, Vasyli G. Krzhanovsky<sup>1</sup>, Daria V. Vasina<sup>2</sup>, Nataliya V. Shkuratova<sup>1</sup>, Elena V. Shidlovskaya<sup>2</sup>, Alexey L. Gorbunov<sup>1</sup>, Daria D. Kustova<sup>2,3</sup>, Evgeniya A. Mazurina<sup>1</sup>, Sofya R. Kozlova<sup>2</sup>, Alexandra V. Soboleva<sup>1</sup>, Igor V. Grigoriev<sup>2</sup>, Lyudmila L. Pankratyeva<sup>1</sup>, Alina S. Odintsova<sup>2,3</sup>, Elizaveta D. Belyaeva<sup>2,3</sup>, Arina A. Bessonova<sup>2</sup>, Lyudmila A. Vasilchenko<sup>2</sup>, Igor P. Lupu<sup>2</sup>, Ruslan R. Adgamov<sup>2</sup>, Artem P. Tkachuk<sup>2</sup>, Elizaveta A. Tokarskaya<sup>2</sup>, Denis Y. Logunov<sup>2,\*</sup> and Alexander L. Gintsburg<sup>2,4</sup>

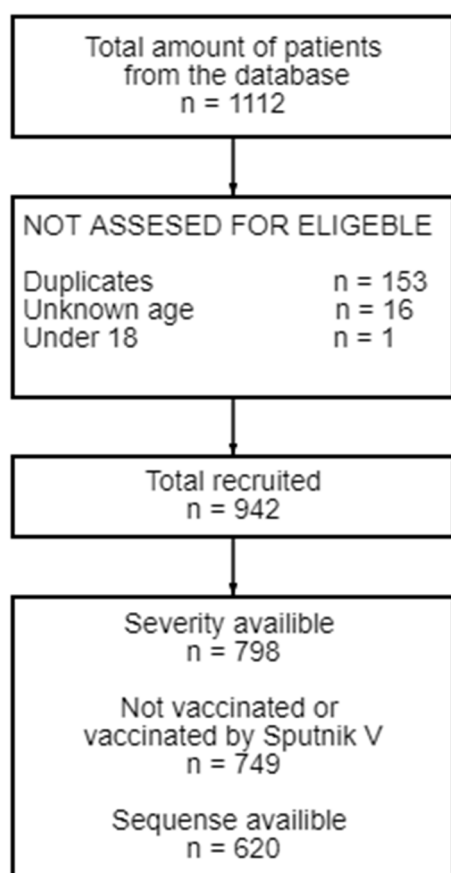

**Figure S1.** Algorithm of data pre-processing

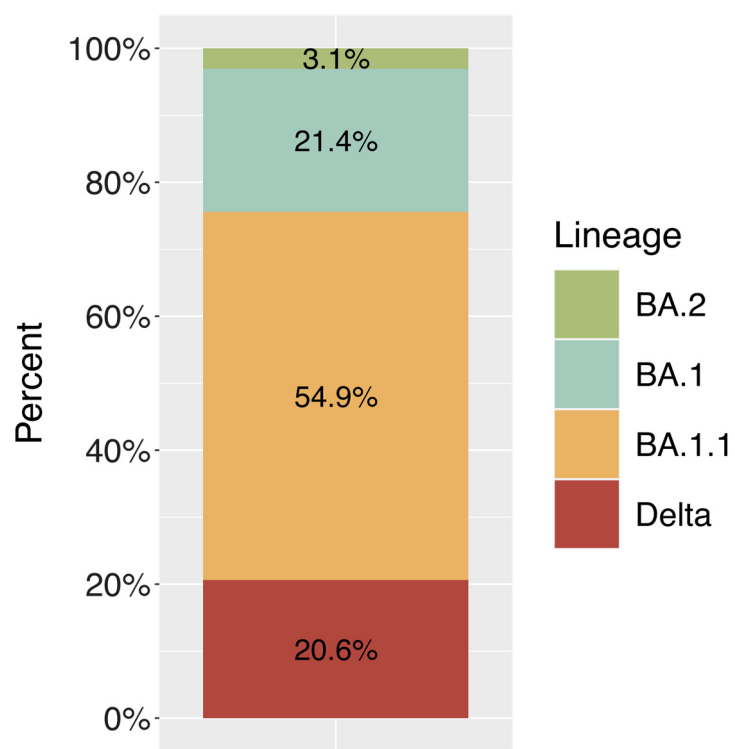

**Figure S2.** The general distribution of proportions of genetic lines according to the results of SARS-CoV-2 genome sequencing.

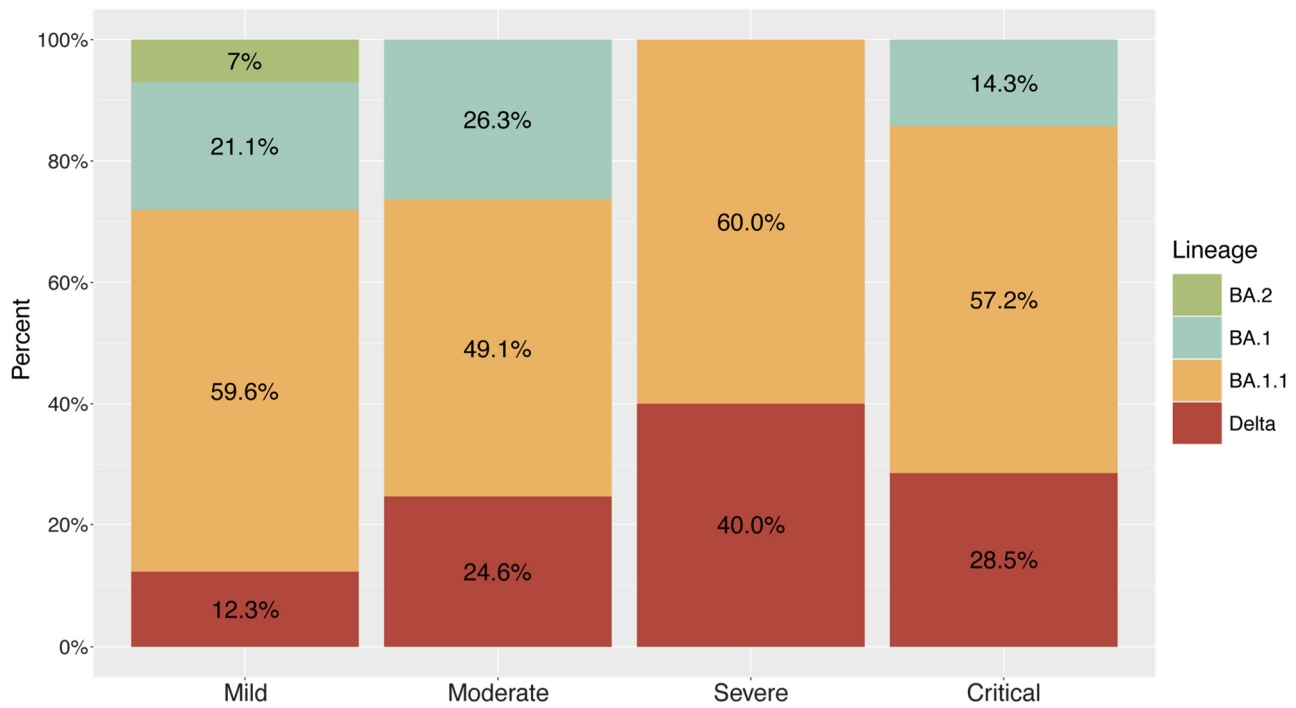

**Figure S3.** Distribution of proportions of genetic lines by severity, according to the results of SARS-CoV-2 genome sequencing.

**Table S1.** Patients, included in the study.

|                                         |                    |
|-----------------------------------------|--------------------|
| Age                                     | 942                |
| Gender                                  | 942                |
| Known PCR tests<br>of them are positive | 942<br>859 (91.2%) |
| Viral load                              | 858                |
| Immunological analysis (BAU)            | 889                |
| IgG RBD (known)                         | 934                |
| IgG NC (known)                          | 934                |
| Severity                                | 798                |
| Vaccination                             | 942                |
| Strain                                  | 620                |
|                                         | <b>460</b>         |

**Table S2.** Demographic characteristics according to the vaccination status.

|                | N   | Age, Me[IQR]                     | Gender:<br>Women, n(%)<br>Men, n (%)    |
|----------------|-----|----------------------------------|-----------------------------------------|
| Non-vaccinated | 668 | 72 [62 – 82]                     | 401 (60.0%)<br>267 (40.0%)              |
| Vaccinated     | 247 | 70 [61 – 80]                     | 124 (50.2%)<br>123 (49.8%)              |
| P              |     | 0.058 (The Mann<br>Whitney test) | 0.008* (Pearson's chi-<br>squared test) |

**Table S3** Demographic characteristics of hospitalized patients according to the number of vaccine doses received.

|                | N   | Age, Me[IQR]                                                                                                              | Gender:<br>Women, n(%)<br>Men, n (%)                                                                                                                                                                                                  |
|----------------|-----|---------------------------------------------------------------------------------------------------------------------------|---------------------------------------------------------------------------------------------------------------------------------------------------------------------------------------------------------------------------------------|
| Non-vaccinated | 668 | 72 [62 – 82]                                                                                                              | 401 (60.0%)<br>267 (40.0%)                                                                                                                                                                                                            |
| 1 component    | 30  | 73 [63 – 78]                                                                                                              | 23 (76.7%)<br>7 (23.3%)                                                                                                                                                                                                               |
| 2 components   | 162 | 67 [57 – 79]                                                                                                              | 83 (51.2%)<br>79 (48.8%)                                                                                                                                                                                                              |
| 3-4 components | 55  | 74 [69 – 81.5]                                                                                                            | 18 (32.7%)<br>37 (67.3%)                                                                                                                                                                                                              |
| p              |     | 0.001* (the Kraskel-Wallis test)<br>P(non-vaccinated – two doses) = 0.006*<br>P(two doses – three or four doses) = 0.004* | <0.001 (Pearson’s chi-squared test)<br>(The proportion of men is higher in the group with more than two vaccine doses received p<0.001, p<0.001, p=0.026)<br><br>In second place-those with two doses received (p = 0.050, p = 0.020) |

**Table S4.** Viral load of all severity groups (including patients with unidentified course of the disease) depending on the strain and vaccination status.

| NP                                                      | Delta                                                                     | Omicron                                                                    | P                              |
|---------------------------------------------------------|---------------------------------------------------------------------------|----------------------------------------------------------------------------|--------------------------------|
| Non-vaccinated                                          | N = 36<br>Ct: 25.58[24.69 - 28.39]<br>GE/ml<br>1.63E06[2.61E05 - 2.58E06] | N = 382<br>Ct: 28.33[24.47 - 32.83]<br>GE/ml<br>1.56E05[5.53E03 - 2.26E06] | 0.002* (The Mann Whitney test) |
| Vaccinated with at least 1 component of «Gam-Covid-Vac» | n = 11<br>26.92[25.84 - 28.85]<br>3.86E05 [1.02E05 - 1.63E06]             | N = 138<br>Ct: 28.15[25.07 - 32.00]<br>GE/ml<br>1.69E05[6.46E03 - 1.65E06] | 0.360 (The Mann Whitney test)  |
| P                                                       | 0.111 (The Mann Whitney test for the index in copies/ml)                  | 0.528 (The Mann Whitney test for the index in copies/ml)                   |                                |

**Table S5.** Distribution of SARS-CoV-2 genetic variants by patients' severity

|                  |   | Severity |          |        |          |
|------------------|---|----------|----------|--------|----------|
|                  |   | Mild     | Moderate | Severe | Critical |
| Delta            | n | 6        | 13       | 1      | 7        |
|                  | % | 11.5%    | 24.1%    | 20.0%  | 35.0%    |
| Omicron (BA.1)   | n | 10       | 15       | 0      | 3        |
|                  | % | 19.2%    | 27.8%    | 0.0%   | 15.0%    |
| Omicron (BA.1.1) | n | 32       | 26       | 4      | 10       |
|                  | % | 61.5%    | 48.1%    | 80.0%  | 50.0%    |
| Omicron (BA.2)   | n | 4        | 0        | 0      | 0        |
|                  | % | 7.7%     | 0.0%     | 0.0%   | 0.0%     |



**Table S6.** The time elapsed since the injection of the last Gam-Covid-Vac component before hospitalization with Covid-19.

|          | N (the date of the last vaccination and the date of the analysis are both known) | Me[IQR] time elapsed since vaccination (the last injection) to the date of analysis, days |
|----------|----------------------------------------------------------------------------------|-------------------------------------------------------------------------------------------|
| Mild     | 66 (98.5%), 1 skip                                                               | 132 [82 – 184]                                                                            |
| Moderate | 116 (97.5%), 3 skips                                                             | 142 [69 – 197.5]                                                                          |
| Severe   | 12 (92.3%), 1 skip                                                               | 153.5 [96.5 – 240.5]                                                                      |
| Critical | 11 (100%)                                                                        | 183 [120.5 – 194]                                                                         |

The data was calculated for hospitalized patients with identified severity and at least one vaccine component injected. P = 0.519 (the Kruskal-Wallis test).

**Table S7.** Viral load and immune response of various virus variants depending on the vaccination status (those vaccinated with drugs other than Gam-Covid-Vac were not included, excluded-4)

|                               | BA.1                        | BA.1.1                                 | BA.2                        | Delta                       | p (the Kruskal - Wallis test)                                                             |
|-------------------------------|-----------------------------|----------------------------------------|-----------------------------|-----------------------------|-------------------------------------------------------------------------------------------|
| <b>Non-vaccinated</b>         | n = 25                      | n = 58                                 | n = 5                       | n = 27                      |                                                                                           |
| Viral load, Ct Me[IQR]        | 24.60 [24.22 - 26.46]       | <b>23.49 [22.20 - 25.29]</b>           | 25.51 [24.30 - 25.66]       | 25.32 [23.96 - 26.01]       | 0.003*<br>p <sup>(BA.1.1 - Delta)</sup> = 0.022*<br>p <sup>(BA.1.1 - BA.1)</sup> = 0.014* |
| Viral load, copies/ml Me[IQR] | 2.23E06 [8.03E05 - 4.22E06] | 6.13E06 [2.21E06 - 1.61E07]            | 2.20E06 [1.55E06 - 4.52E06] | 1.77E06 [1.37E06 - 4.33E06] | 0.012*<br>p <sup>(BA.1.1 - BA.1)</sup> = 0.023*                                           |
| IgG NC                        | 0.71 [0.24 - 7.85]          | 0.78 [0.28 - 5.76]                     | n=4<br>0.66 [0.26 - 1.07]   | 1.25 [0.29 - 11.75]         | 0.622                                                                                     |
| IgG RBD                       | 1.05 [0.56 - 16.88]         | 1.34 [0.73 - 10.74]                    | n=4<br>0.51 [0.37 - 1.83]   | 1.89 [0.95 - 5.55]          | 0.269                                                                                     |
| <b>Vaccinated</b>             | n = 9                       | n = 23                                 | n = 0                       | n = 6                       |                                                                                           |
| Viral load, Ct Me[IQR]        | 24.46 [23.04 - 26.64]       | n = 22<br><b>24.26 [23.24 - 25.48]</b> |                             | 26.08 [25.16 - 26.92]       | 0.142                                                                                     |
| Viral load, copies/ml Me[IQR] | 2.54E06 [6.81E05 - 6.79E06] | n = 22<br>2.91E06 [1.55E06 - 6.39E06]  |                             | 1.63E06 [4.64E05 - 1.85E06] | 0.165                                                                                     |
| IgG NC                        | 0.61 [0.28 - 2.25]          | 0.65 [0.24 - 1.76]                     |                             | 0.56 [0.18 - 2.23]          | 0.956                                                                                     |
| IgG RBD                       | 8.82 [2.70 - 14.51]         | 13.54 [2.32 - 43.82]                   |                             | 20.73 [3.10 - 96.54]        | 0.745                                                                                     |

**Table S8.** Features of the immune response in immunized groups depending on the severity. Only those who were not vaccinated and those vaccinated with at least one “Gam-Covid-Vac” component were studied (n = 749). Immunological analysis for IgG antibodies (Mindray).

|                                                | Mild                                  | Moderate                              | Severe                          | Critical                       | P                                                                   |
|------------------------------------------------|---------------------------------------|---------------------------------------|---------------------------------|--------------------------------|---------------------------------------------------------------------|
| Non-vaccinated                                 | N = 165<br>2.23 [0.42 – 18.22]        | N = 275<br>5.92 [0.91 – 24.49]        | N = 44<br>15.93 [1.03 – 93.35]  | N = 60<br>24.69 [2.58 – 87.77] | <0.001* (The Kruskal - Wallis test )<br>P14 <0.001*<br>P24 = 0.015* |
| Vaccinated with 1 «Gam-Covid-Vac» component    | N = 5<br>8.05 [0.62 – 17.19]          | N = 16<br>6.74 [2.12 – 59.66]         | N = 1<br>--                     | N = 2<br>76.51 [8.39 – 144.63] | 0.351 (The Kruskal - Wallis test)                                   |
| Vaccinated with 2 «Gam-Covid-Vac» components   | N = 40<br>8.18 [2.12 – 58.04]         | N = 80<br>19.56 [5.59 – 46.56]        | N = 9<br>48.54 [12.29 – 124.21] | N = 8<br>5.04 [1.10 – 163.28]  | 0.389 (The Kruskal - Wallis test)                                   |
| Vaccinated with 3-4 «Gam-Covid-Vac» components | N = 21<br>28.92 [12.81 – 38.47]       | N = 19<br>24.39 [12.92 – 56.92]       | N = 3<br>5.12 [3.49 – 12.71]    | N = 1                          | 0.204 (The Kruskal - Wallis test)                                   |
| P                                              | <0.001*<br>P02 = 0.012*<br>P03<0.001* | <0.001*<br>P02 < 0.001*<br>P03=0.004* | 0.254                           | 0.823                          |                                                                     |

**Table S9.** Analysis of the epidemiological efficacy of vaccination in protection against the severe course of COVID-19 in hospitalized patients (Omicron strain only, one known case of reinfection was deleted). 448 patients were studied.

| Quantity of 18+ people in Moscow                            | Quantity vaccinated                                                                   | Quantity of previously ill                                                             | Quantity of "non-immune"                                                                    |                                  |
|-------------------------------------------------------------|---------------------------------------------------------------------------------------|----------------------------------------------------------------------------------------|---------------------------------------------------------------------------------------------|----------------------------------|
| 10 600 000                                                  | 6 000 000                                                                             | 2 232 836                                                                              | 2 367 164                                                                                   |                                  |
|                                                             | Got infected and had no less than 1 component of Gam-Covid-Vac,<br>N<br>VE % (95% CI) | Got infected and had no less than 2 components of Gam-Covid-Vac,<br>N<br>VE % (95% CI) | Got infected and had at no less than 3-4 components of Gam-Covid-Vac,<br>N<br>VE % (95% CI) | Non-vaccinated got infected<br>N |
| Patients with mild and more severe forms of the disease     | 115<br>86.4%<br>(95% CI 83.2 - 89.0%)                                                 | 99<br>88.3%<br>(95% CI 85.3 - 90.6%)                                                   | 30<br>96.4%<br>(95% CI 94.8 - 97.6%)                                                        | 333                              |
| Patients with moderate and more severe forms of the disease | 80<br>86.6%<br>(95% CI 82.7 - 89.6%)                                                  | 68<br>88.6%<br>(95% CI 85.1 - 91.3%)                                                   | 17<br>97.1%<br>(95% CI 95.3 - 98.3%)                                                        | 235                              |
| Patients with severe and critical forms of the disease      | 10<br>92.8%<br>(95% CI 85.9 - 96.3%)                                                  | 9<br>93.5%<br>(95% CI 86.9 - 96.8%)                                                    | 3<br>97.8%<br>(95% CI 93.1 - 99.3%)                                                         | 55                               |
| Patients in critical condition                              | 6<br>91.8%<br>(95% CI 80.3 - 96.6%)                                                   | 5<br>93.2%<br>(95% CI 82.4 - 97.4%)                                                    | 1<br>98.6%<br>(95% CI 90.0 - 99.8%)                                                         | 29                               |

**Table S10.** The number of people vaccinated against COVID-19 in Moscow

Reference

<https://gogov.ru/covid-v-stats/msk#data>

Cumulative total

| For Date          | Vaccinated, person | Fully vaccinated | Revaccinated |
|-------------------|--------------------|------------------|--------------|
| 11 February 2022  | 6 199 585          | 5 803 415        |              |
| 4 February 2022   | 6 149 637          | 5 756 593        |              |
| 28 January 2022   | 6 062 844          | 5 673 588        |              |
| 26 January 2022   | 6 000 000          |                  | 1 000 000    |
| 1 January 2022    | 5 900 000          |                  |              |
| 17 December 2021  | 5 815 552          | 5 467 395        |              |
| 10 December 2021  | 5 815 552          | 5 296 362        |              |
| 6 December 2021   | 5 700 000          |                  | 680 000      |
| 3 December 2021   | 5 637 147          | 5 072 241        |              |
| 26 November 2021  | 5 502 513          | 4 926 308        |              |
| 19 November 2021  | 5 330 506          | 4 788 247        | 750 000      |
| 4 November 2021   | 5 051 629          | 4 410 000        |              |
| 22 октября 2021   | 5 051 629          |                  |              |
| 14 октября 2021   | 5 000 000          |                  | 279 000      |
| 5 октября 2021    | 5 000 000          |                  |              |
| 13 September 2021 | 5 000 000          |                  | 118 000      |
| 11 August 2021    | 4 539 902          | 3 611 289        |              |
| 8 August 2021     | 4 479 278          | 3 556 053        |              |
| 1 August 2021     | 4 381 085          | 3 194 373        |              |
| 25 July 2021      | 4 270 379          | 2 694 832        |              |
| 20 July 2021      | 4 000 000          | 2 200 000        |              |
| 16 July 2021      | 3 800 000          | 2 000 000        |              |
| 8 July 2021       | 3 200 000          |                  |              |
| 7 July 2021       | 3 100 000          | 1 800 000        |              |
| 5 July 2021       | 3 000 000          | 1 800 000        |              |
| 3 July 2021       | 2 700 000          |                  |              |
| 2 July 2021       | 2 600 000          |                  |              |
| 26 June 2021      | 2 000 000          | 1 600 000        |              |
| 22 June 2021      | 2 000 000          |                  |              |
| 18 June 2021      | 1 800 000          | 1 500 000        |              |
| 16 June 2021      | 1 800 000          |                  |              |
| 26 May 2021       | 1 500 000          |                  |              |
| 18 May 2021       | 1 400 000          | 1 300 000        |              |

---

|                  |           |         |
|------------------|-----------|---------|
| 14 May 2021      | 1 300 000 |         |
| 15 April 2021    | 1 000 000 | 820 000 |
| 26 March 2021    | 1 000 000 | 800 000 |
| 25 March 2021    | 1 000 000 |         |
| 17 March 2021    | 700 000   |         |
| 15 March 2021    | 700 000   |         |
| 5 March 2021     | 700 000   |         |
| 4 March 2021     | 600 000   |         |
| 26 February 2021 | 600 000   |         |
| 18 February 2021 | 600 000   |         |
| 17 February 2021 | 555 000   |         |
| 11 February 2021 | 500 000   |         |
| 4 February 2021  | 400 000   |         |
| 28 January 2021  | 320 000   |         |
| 21 January 2021  | 220 000   |         |
| 19 January 2021  | 200 000   |         |
| 18 January 2021  | 190 000   |         |
| 14 January 2021  | 140 000   |         |
| 1 January 2021   | 50 000    |         |

---

Table S11. Coronavirus statistics in Moscow

| Reference  | <a href="https://gogov.ru/covid-19/msk#data">https://gogov.ru/covid-19/msk#data</a> |              |            |
|------------|-------------------------------------------------------------------------------------|--------------|------------|
| Date       | Cases                                                                               | Deaths       | Recoveries |
| 07.06.2022 | 2 772 365 (+167)                                                                    | 43 824 (+11) | 2 581 598  |
| 06.06.2022 | 2 772 198 (+189)                                                                    | 43 813 (+14) | 2 581 254  |
| 05.06.2022 | 2 772 009 (+185)                                                                    | 43 799 (+13) | 2 581 043  |
| 04.06.2022 | 2 771 824 (+272)                                                                    | 43 786 (+15) | 2 580 895  |
| 03.06.2022 | 2 771 552 (+264)                                                                    | 43 771 (+14) | 2 580 581  |
| 02.06.2022 | 2 771 288 (+353)                                                                    | 43 757 (+10) | 2 580 293  |
| 01.06.2022 | 2 770 935 (+367)                                                                    | 43 747 (+13) | 2 580 022  |
| 31.05.2022 | 2 770 568 (+190)                                                                    | 43 734 (+14) | 2 579 638  |
| 30.05.2022 | 2 770 378 (+191)                                                                    | 43 720 (+12) | 2 579 330  |
| 29.05.2022 | 2 770 187 (+286)                                                                    | 43 708 (+11) | 2 579 114  |
| 28.05.2022 | 2 769 901 (+267)                                                                    | 43 697 (+13) | 2 578 937  |
| 27.05.2022 | 2 769 634 (+319)                                                                    | 43 684 (+12) | 2 578 716  |
| 26.05.2022 | 2 769 315 (+368)                                                                    | 43 672 (+14) | 2 578 355  |
| 25.05.2022 | 2 768 947 (+370)                                                                    | 43 658 (+17) | 2 578 023  |
| 24.05.2022 | 2 768 577 (+172)                                                                    | 43 641 (+15) | 2 577 664  |
| 23.05.2022 | 2 768 405 (+229)                                                                    | 43 626 (+14) | 2 577 305  |
| 22.05.2022 | 2 768 176 (+278)                                                                    | 43 612 (+13) | 2 577 050  |
| 21.05.2022 | 2 767 898 (+337)                                                                    | 43 599 (+15) | 2 576 765  |
| 20.05.2022 | 2 767 561 (+368)                                                                    | 43 584 (+14) | 2 576 412  |
| 19.05.2022 | 2 767 193 (+365)                                                                    | 43 570 (+16) | 2 575 983  |
| 18.05.2022 | 2 766 828 (+380)                                                                    | 43 554 (+17) | 2 575 553  |
| 17.05.2022 | 2 766 448 (+212)                                                                    | 43 537 (+19) | 2 575 194  |
| 16.05.2022 | 2 766 236 (+288)                                                                    | 43 518 (+18) | 2 574 946  |
| 15.05.2022 | 2 765 948 (+335)                                                                    | 43 500 (+14) | 2 574 691  |
| 14.05.2022 | 2 765 613 (+402)                                                                    | 43 486 (+16) | 2 574 424  |
| 13.05.2022 | 2 765 211 (+474)                                                                    | 43 470 (+15) | 2 574 079  |
| 12.05.2022 | 2 764 737 (+294)                                                                    | 43 455 (+18) | 2 573 636  |
| 11.05.2022 | 2 764 443 (+217)                                                                    | 43 437 (+16) | 2 573 152  |
| 10.05.2022 | 2 764 226 (+237)                                                                    | 43 421 (+17) | 2 572 757  |
| 09.05.2022 | 2 763 989 (+268)                                                                    | 43 404 (+19) | 2 572 477  |
| 08.05.2022 | 2 763 721 (+396)                                                                    | 43 385 (+16) | 2 572 227  |
| 07.05.2022 | 2 763 325 (+387)                                                                    | 43 369 (+18) | 2 571 904  |
| 06.05.2022 | 2 762 938 (+526)                                                                    | 43 351 (+19) | 2 571 492  |
| 05.05.2022 | 2 762 412 (+393)                                                                    | 43 332 (+16) | 2 570 999  |
| 04.05.2022 | 2 762 019 (+282)                                                                    | 43 316 (+19) | 2 570 377  |

|            |                    |              |           |
|------------|--------------------|--------------|-----------|
| 03.05.2022 | 2 761 737 (+250)   | 43 297 (+18) | 2 569 856 |
| 02.05.2022 | 2 761 487 (+334)   | 43 279 (+17) | 2 569 374 |
| 01.05.2022 | 2 761 153 (+455)   | 43 262 (+19) | 2 568 898 |
| 30.04.2022 | 2 760 698 (+485)   | 43 243 (+18) | 2 568 474 |
| 29.04.2022 | 2 760 213 (+570)   | 43 225 (+17) | 2 567 858 |
| 28.04.2022 | 2 759 643 (+629)   | 43 208 (+18) | 2 567 229 |
| 27.04.2022 | 2 759 014 (+760)   | 43 190 (+16) | 2 566 693 |
| 26.04.2022 | 2 758 254 (+378)   | 43 174 (+19) | 2 566 156 |
| 25.04.2022 | 2 757 876 (+455)   | 43 155 (+17) | 2 565 312 |
| 24.04.2022 | 2 757 421 (+584)   | 43 138 (+18) | 2 564 838 |
| 23.04.2022 | 2 756 837 (+602)   | 43 120 (+15) | 2 564 391 |
| 22.04.2022 | 2 756 235 (+644)   | 43 105 (+16) | 2 563 696 |
| 21.04.2022 | 2 755 591 (+616)   | 43 089 (+18) | 2 562 943 |
| 20.04.2022 | 2 754 975 (+749)   | 43 071 (+19) | 2 562 329 |
| 19.04.2022 | 2 754 226 (+416)   | 43 052 (+18) | 2 561 601 |
| 18.04.2022 | 2 753 810 (+497)   | 43 034 (+17) | 2 560 708 |
| 17.04.2022 | 2 753 313 (+603)   | 43 017 (+19) | 2 560 043 |
| 16.04.2022 | 2 752 710 (+634)   | 42 998 (+16) | 2 559 246 |
| 15.04.2022 | 2 752 076 (+766)   | 42 982 (+18) | 2 558 422 |
| 14.04.2022 | 2 751 310 (+868)   | 42 964 (+17) | 2 557 511 |
| 13.04.2022 | 2 750 442 (+933)   | 42 947 (+19) | 2 556 555 |
| 12.04.2022 | 2 749 509 (+489)   | 42 928 (+18) | 2 555 538 |
| 11.04.2022 | 2 749 020 (+589)   | 42 910 (+19) | 2 554 544 |
| 10.04.2022 | 2 748 431 (+742)   | 42 891 (+18) | 2 553 846 |
| 09.04.2022 | 2 747 689 (+801)   | 42 873 (+17) | 2 553 278 |
| 08.04.2022 | 2 746 888 (+855)   | 42 856 (+19) | 2 552 447 |
| 07.04.2022 | 2 746 033 (+1 004) | 42 837 (+20) | 2 551 635 |
| 06.04.2022 | 2 745 029 (+1 072) | 42 817 (+18) | 2 550 593 |
| 05.04.2022 | 2 743 957 (+596)   | 42 799 (+21) | 2 549 372 |
| 04.04.2022 | 2 743 361 (+698)   | 42 778 (+20) | 2 548 262 |
| 03.04.2022 | 2 742 663 (+835)   | 42 758 (+22) | 2 547 527 |
| 02.04.2022 | 2 741 828 (+994)   | 42 736 (+21) | 2 546 782 |
| 01.04.2022 | 2 740 834 (+1 038) | 42 715 (+19) | 2 545 875 |
| 31.03.2022 | 2 739 796 (+1 130) | 42 696 (+22) | 2 544 974 |
| 30.03.2022 | 2 738 666 (+1 165) | 42 674 (+21) | 2 543 959 |
| 29.03.2022 | 2 737 501 (+708)   | 42 653 (+23) | 2 542 802 |
| 28.03.2022 | 2 736 793 (+703)   | 42 630 (+20) | 2 541 469 |
| 27.03.2022 | 2 736 090 (+867)   | 42 610 (+22) | 2 540 464 |
| 26.03.2022 | 2 735 223 (+925)   | 42 588 (+23) | 2 539 938 |



|            |                     |              |           |
|------------|---------------------|--------------|-----------|
| 25.03.2022 | 2 734 298 (+1 086)  | 42 565 (+25) | 2 539 045 |
| 24.03.2022 | 2 733 212 (+1 163)  | 42 540 (+26) | 2 538 159 |
| 23.03.2022 | 2 732 049 (+1 306)  | 42 514 (+28) | 2 537 114 |
| 22.03.2022 | 2 730 743 (+723)    | 42 486 (+30) | 2 535 852 |
| 21.03.2022 | 2 730 020 (+771)    | 42 456 (+29) | 2 534 143 |
| 20.03.2022 | 2 729 249 (+928)    | 42 427 (+31) | 2 533 045 |
| 19.03.2022 | 2 728 321 (+927)    | 42 396 (+30) | 2 532 057 |
| 18.03.2022 | 2 727 394 (+1 130)  | 42 366 (+38) | 2 530 464 |
| 17.03.2022 | 2 726 264 (+1 352)  | 42 328 (+42) | 2 528 385 |
| 16.03.2022 | 2 724 912 (+1 621)  | 42 286 (+40) | 2 526 380 |
| 15.03.2022 | 2 723 291 (+999)    | 42 246 (+41) | 2 524 854 |
| 14.03.2022 | 2 722 292 (+957)    | 42 205 (+44) | 2 523 496 |
| 13.03.2022 | 2 721 335 (+1 437)  | 42 161 (+49) | 2 522 435 |
| 12.03.2022 | 2 719 898 (+1 655)  | 42 112 (+52) | 2 521 223 |
| 11.03.2022 | 2 718 243 (+2 102)  | 42 060 (+58) | 2 519 398 |
| 10.03.2022 | 2 716 141 (+1 215)  | 42 002 (+57) | 2 517 165 |
| 09.03.2022 | 2 714 926 (+1 292)  | 41 945 (+59) | 2 514 574 |
| 08.03.2022 | 2 713 634 (+1 151)  | 41 886 (+67) | 2 511 907 |
| 07.03.2022 | 2 712 483 (+1 542)  | 41 819 (+65) | 2 508 951 |
| 06.03.2022 | 2 710 941 (+1 901)  | 41 754 (+75) | 2 506 536 |
| 05.03.2022 | 2 709 040 (+2 060)  | 41 679 (+77) | 2 504 198 |
| 04.03.2022 | 2 706 980 (+2 463)  | 41 602 (+79) | 2 501 129 |
| 03.03.2022 | 2 704 517 (+2 683)  | 41 523 (+82) | 2 497 491 |
| 02.03.2022 | 2 701 834 (+3 024)  | 41 441 (+81) | 2 492 797 |
| 01.03.2022 | 2 698 810 (+2 066)  | 41 360 (+84) | 2 487 594 |
| 28.02.2022 | 2 696 744 (+2 584)  | 41 276 (+80) | 2 481 921 |
| 27.02.2022 | 2 694 160 (+3 050)  | 41 196 (+81) | 2 477 563 |
| 26.02.2022 | 2 691 110 (+3 947)  | 41 115 (+83) | 2 473 013 |
| 25.02.2022 | 2 687 163 (+3 333)  | 41 032 (+84) | 2 466 755 |
| 24.02.2022 | 2 683 830 (+4 730)  | 40 948 (+82) | 2 459 296 |
| 23.02.2022 | 2 679 100 (+5 664)  | 40 866 (+83) | 2 452 895 |
| 22.02.2022 | 2 673 436 (+4 250)  | 40 783 (+85) | 2 443 899 |
| 21.02.2022 | 2 669 186 (+4 997)  | 40 698 (+83) | 2 431 079 |
| 20.02.2022 | 2 664 189 (+6 388)  | 40 615 (+84) | 2 418 457 |
| 19.02.2022 | 2 657 801 (+6 874)  | 40 531 (+87) | 2 398 976 |
| 18.02.2022 | 2 650 927 (+8 308)  | 40 444 (+86) | 2 363 212 |
| 17.02.2022 | 2 642 619 (+9 705)  | 40 358 (+85) | 2 324 231 |
| 16.02.2022 | 2 632 914 (+11 262) | 40 273 (+87) | 2 281 792 |
| 15.02.2022 | 2 621 652 (+8 160)  | 40 186 (+84) | 2 244 013 |

|            |                     |              |           |
|------------|---------------------|--------------|-----------|
| 14.02.2022 | 2 613 492 (+9 616)  | 40 102 (+82) | 2 214 046 |
| 13.02.2022 | 2 603 876 (+12 496) | 40 020 (+86) | 2 185 131 |
| 12.02.2022 | 2 591 380 (+14 336) | 39 934 (+85) | 2 160 558 |
| 11.02.2022 | 2 577 044 (+18 541) | 39 849 (+81) | 2 140 512 |
| 10.02.2022 | 2 558 503 (+22 747) | 39 768 (+84) | 2 118 897 |
| 09.02.2022 | 2 535 756 (+11 521) | 39 684 (+82) | 2 094 533 |
| 08.02.2022 | 2 524 235 (+12 902) | 39 602 (+85) | 2 068 597 |
| 07.02.2022 | 2 511 333 (+15 442) | 39 517 (+83) | 2 047 924 |
| 06.02.2022 | 2 495 891 (+18 856) | 39 434 (+81) | 2 034 827 |
| 05.02.2022 | 2 477 035 (+22 444) | 39 353 (+82) | 2 021 805 |
| 04.02.2022 | 2 454 591 (+25 019) | 39 271 (+79) | 2 007 965 |
| 03.02.2022 | 2 429 572 (+26 904) | 39 192 (+76) | 1 994 160 |
| 02.02.2022 | 2 402 668 (+23 784) | 39 116 (+78) | 1 981 801 |
| 01.02.2022 | 2 378 884 (+21 533) | 39 038 (+76) | 1 970 326 |
| 31.01.2022 | 2 357 351 (+23 417) | 38 962 (+75) | 1 962 382 |
| 30.01.2022 | 2 333 934 (+24 030) | 38 887 (+77) | 1 956 577 |
| 29.01.2022 | 2 309 904 (+26 488) | 38 810 (+76) | 1 951 552 |
| 28.01.2022 | 2 283 416 (+23 994) | 38 734 (+74) | 1 946 142 |
| 27.01.2022 | 2 259 422 (+26 586) | 38 660 (+72) | 1 940 819 |
| 26.01.2022 | 2 232 836 (+19 856) | 38 588 (+74) | 1 935 354 |
| 25.01.2022 | 2 212 980 (+18 935) | 38 514 (+75) | 1 931 016 |
| 24.01.2022 | 2 194 045 (+19 509) | 38 439 (+71) | 1 927 017 |
| 23.01.2022 | 2 174 536 (+17 528) | 38 368 (+73) | 1 923 786 |
| 22.01.2022 | 2 157 008 (+16 094) | 38 295 (+69) | 1 920 971 |
| 21.01.2022 | 2 140 914 (+15 987) | 38 226 (+72) | 1 917 946 |
| 20.01.2022 | 2 124 927 (+11 557) | 38 154 (+70) | 1 915 633 |
| 19.01.2022 | 2 113 370 (+8 795)  | 38 084 (+71) | 1 913 326 |
| 18.01.2022 | 2 104 575 (+8 342)  | 38 013 (+69) | 1 911 329 |
| 17.01.2022 | 2 096 233 (+7 529)  | 37 944 (+67) | 1 909 491 |
| 16.01.2022 | 2 088 704 (+6 480)  | 37 877 (+70) | 1 907 686 |
| 15.01.2022 | 2 082 224 (+6 555)  | 37 807 (+68) | 1 905 315 |
| 14.01.2022 | 2 075 669 (+5 712)  | 37 739 (+69) | 1 902 438 |
| 13.01.2022 | 2 069 957 (+5 490)  | 37 670 (+71) | 1 899 550 |
| 12.01.2022 | 2 064 467 (+4 008)  | 37 599 (+66) | 1 896 693 |
| 11.01.2022 | 2 060 459 (+4 635)  | 37 533 (+68) | 1 893 867 |
| 10.01.2022 | 2 055 824 (+2 778)  | 37 465 (+70) | 1 891 175 |
| 09.01.2022 | 2 053 046 (+3 274)  | 37 395 (+71) | 1 889 078 |
| 08.01.2022 | 2 049 772 (+3 072)  | 37 324 (+69) | 1 887 020 |
| 07.01.2022 | 2 046 700 (+3 694)  | 37 255 (+72) | 1 884 960 |

|            |                    |              |           |
|------------|--------------------|--------------|-----------|
| 06.01.2022 | 2 043 006 (+2 357) | 37 183 (+67) | 1 882 737 |
| 05.01.2022 | 2 040 649 (+2 307) | 37 116 (+71) | 1 880 499 |
| 04.01.2022 | 2 038 342 (+1 967) | 37 045 (+68) | 1 877 851 |
| 03.01.2022 | 2 036 375 (+1 335) | 36 977 (+70) | 1 875 577 |
| 02.01.2022 | 2 035 040 (+1 824) | 36 907 (+69) | 1 873 286 |
| 01.01.2022 | 2 033 216 (+2 472) | 36 838 (+67) | 1 871 054 |
| 31.12.2021 | 2 030 744 (+2 739) | 36 771 (+69) | 1 868 696 |
| 30.12.2021 | 2 028 005 (+2 661) | 36 702 (+71) | 1 865 970 |
| 29.12.2021 | 2 025 344 (+1 798) | 36 631 (+70) | 1 863 475 |
| 28.12.2021 | 2 023 546 (+1 705) | 36 561 (+73) | 1 860 822 |
| 27.12.2021 | 2 021 841 (+2 239) | 36 488 (+68) | 1 857 711 |
| 26.12.2021 | 2 019 602 (+2 180) | 36 420 (+71) | 1 855 083 |
| 25.12.2021 | 2 017 422 (+2 714) | 36 349 (+72) | 1 852 320 |
| 24.12.2021 | 2 014 708 (+2 126) | 36 277 (+75) | 1 849 212 |
| 23.12.2021 | 2 012 582 (+3 062) | 36 202 (+77) | 1 846 440 |
| 22.12.2021 | 2 009 520 (+1 904) | 36 125 (+81) | 1 843 148 |
| 21.12.2021 | 2 007 616 (+1 906) | 36 044 (+80) | 1 840 029 |
| 20.12.2021 | 2 005 710 (+2 630) | 35 964 (+78) | 1 836 874 |
| 19.12.2021 | 2 003 080 (+3 013) | 35 886 (+81) | 1 834 232 |
| 18.12.2021 | 2 000 067 (+2 283) | 35 805 (+79) | 1 831 571 |
| 17.12.2021 | 1 997 784 (+2 755) | 35 726 (+83) | 1 828 635 |
| 16.12.2021 | 1 995 029 (+3 322) | 35 643 (+85) | 1 825 126 |
| 15.12.2021 | 1 991 707 (+2 459) | 35 558 (+87) | 1 822 086 |
| 14.12.2021 | 1 989 248 (+1 976) | 35 471 (+89) | 1 819 020 |
| 13.12.2021 | 1 987 272 (+2 894) | 35 382 (+84) | 1 815 584 |
| 12.12.2021 | 1 984 378 (+2 862) | 35 298 (+88) | 1 812 568 |
| 11.12.2021 | 1 981 516 (+3 140) | 35 210 (+86) | 1 809 074 |
| 10.12.2021 | 1 978 376 (+3 477) | 35 124 (+89) | 1 805 490 |
| 09.12.2021 | 1 974 899 (+2 948) | 35 035 (+92) | 1 802 118 |
| 08.12.2021 | 1 971 951 (+3 004) | 34 943 (+90) | 1 798 947 |
| 07.12.2021 | 1 968 947 (+2 573) | 34 853 (+94) | 1 795 940 |
| 06.12.2021 | 1 966 374 (+3 134) | 34 759 (+91) | 1 792 971 |
| 05.12.2021 | 1 963 240 (+3 301) | 34 668 (+92) | 1 790 218 |
| 04.12.2021 | 1 959 939 (+3 356) | 34 576 (+93) | 1 787 034 |
| 03.12.2021 | 1 956 583 (+3 304) | 34 483 (+95) | 1 783 316 |
| 02.12.2021 | 1 953 279 (+3 805) | 34 388 (+92) | 1 779 716 |
| 01.12.2021 | 1 949 474 (+2 757) | 34 296 (+94) | 1 776 082 |
| 30.11.2021 | 1 946 717 (+2 788) | 34 202 (+97) | 1 772 354 |
| 29.11.2021 | 1 943 929 (+3 434) | 34 105 (+93) | 1 768 538 |

|            |                    |              |           |
|------------|--------------------|--------------|-----------|
| 28.11.2021 | 1 940 495 (+3 086) | 34 012 (+95) | 1 764 835 |
| 27.11.2021 | 1 937 409 (+3 430) | 33 917 (+96) | 1 760 697 |
| 26.11.2021 | 1 933 979 (+3 929) | 33 821 (+94) | 1 755 581 |
| 25.11.2021 | 1 930 050 (+3 349) | 33 727 (+92) | 1 750 445 |
| 24.11.2021 | 1 926 701 (+2 533) | 33 635 (+93) | 1 745 284 |
| 23.11.2021 | 1 924 168 (+2 749) | 33 542 (+96) | 1 739 891 |
| 22.11.2021 | 1 921 419 (+2 786) | 33 446 (+94) | 1 734 540 |
| 21.11.2021 | 1 918 633 (+3 438) | 33 352 (+97) | 1 729 001 |
| 20.11.2021 | 1 915 195 (+3 239) | 33 255 (+93) | 1 722 920 |
| 19.11.2021 | 1 911 956 (+3 371) | 33 162 (+95) | 1 716 433 |
| 18.11.2021 | 1 908 585 (+4 062) | 33 067 (+94) | 1 709 871 |
| 17.11.2021 | 1 904 523 (+2 966) | 32 973 (+96) | 1 702 667 |
| 16.11.2021 | 1 901 557 (+2 606) | 32 877 (+97) | 1 695 190 |
| 15.11.2021 | 1 898 951 (+3 789) | 32 780 (+93) | 1 687 803 |
| 14.11.2021 | 1 895 162 (+3 734) | 32 687 (+95) | 1 681 439 |
| 13.11.2021 | 1 891 428 (+4 185) | 32 592 (+97) | 1 674 966 |
| 12.11.2021 | 1 887 243 (+5 183) | 32 495 (+96) | 1 668 369 |
| 11.11.2021 | 1 882 060 (+6 240) | 32 399 (+94) | 1 661 417 |
| 10.11.2021 | 1 875 820 (+3 927) | 32 305 (+98) | 1 655 912 |
| 09.11.2021 | 1 871 893 (+5 287) | 32 207 (+95) | 1 648 363 |
| 08.11.2021 | 1 866 606 (+4 982) | 32 112 (+97) | 1 641 106 |
| 07.11.2021 | 1 861 624 (+4 975) | 32 015 (+96) | 1 635 844 |
| 06.11.2021 | 1 856 649 (+6 880) | 31 919 (+98) | 1 630 606 |
| 05.11.2021 | 1 849 769 (+6 407) | 31 821 (+93) | 1 624 648 |
| 04.11.2021 | 1 843 362 (+6 305) | 31 728 (+97) | 1 618 624 |
| 03.11.2021 | 1 837 057 (+6 827) | 31 631 (+95) | 1 611 991 |
| 02.11.2021 | 1 830 230 (+5 736) | 31 536 (+98) | 1 605 363 |
| 01.11.2021 | 1 824 494 (+7 103) | 31 438 (+96) | 1 599 004 |
| 31.10.2021 | 1 817 391 (+7 603) | 31 342 (+94) | 1 593 747 |
| 30.10.2021 | 1 809 788 (+7 267) | 31 248 (+97) | 1 588 697 |
| 29.10.2021 | 1 802 521 (+7 511) | 31 151 (+93) | 1 583 191 |
| 28.10.2021 | 1 795 010 (+8 440) | 31 058 (+95) | 1 578 057 |
| 27.10.2021 | 1 786 570 (+5 789) | 30 963 (+91) | 1 572 825 |
| 26.10.2021 | 1 780 781 (+6 074) | 30 872 (+86) | 1 568 354 |
| 25.10.2021 | 1 774 707 (+7 778) | 30 786 (+83) | 1 564 430 |
| 24.10.2021 | 1 766 929 (+5 279) | 30 703 (+84) | 1 560 538 |
| 23.10.2021 | 1 761 650 (+7 803) | 30 619 (+82) | 1 556 721 |
| 22.10.2021 | 1 753 847 (+8 166) | 30 537 (+79) | 1 552 735 |
| 21.10.2021 | 1 745 681 (+7 897) | 30 458 (+77) | 1 548 573 |

|            |                    |              |           |
|------------|--------------------|--------------|-----------|
| 20.10.2021 | 1 737 784 (+5 847) | 30 381 (+76) | 1 544 301 |
| 19.10.2021 | 1 731 937 (+5 700) | 30 305 (+73) | 1 540 144 |
| 18.10.2021 | 1 726 237 (+6 823) | 30 232 (+69) | 1 536 156 |
| 17.10.2021 | 1 719 414 (+6 740) | 30 163 (+70) | 1 532 919 |
| 16.10.2021 | 1 712 674 (+6 545) | 30 093 (+72) | 1 529 713 |
| 15.10.2021 | 1 706 129 (+6 631) | 30 021 (+70) | 1 526 076 |
| 14.10.2021 | 1 699 498 (+6 712) | 29 951 (+71) | 1 522 320 |
| 13.10.2021 | 1 692 786 (+4 410) | 29 880 (+72) | 1 519 184 |
| 12.10.2021 | 1 688 376 (+4 699) | 29 808 (+70) | 1 516 617 |
| 11.10.2021 | 1 683 677 (+5 002) | 29 738 (+71) | 1 514 140 |
| 10.10.2021 | 1 678 675 (+4 610) | 29 667 (+72) | 1 511 856 |
| 09.10.2021 | 1 674 065 (+6 001) | 29 595 (+70) | 1 509 679 |
| 08.10.2021 | 1 668 064 (+4 595) | 29 525 (+71) | 1 507 468 |
| 07.10.2021 | 1 663 469 (+5 404) | 29 454 (+69) | 1 505 180 |
| 06.10.2021 | 1 658 065 (+3 589) | 29 385 (+71) | 1 502 833 |
| 05.10.2021 | 1 654 476 (+3 827) | 29 314 (+72) | 1 500 434 |
| 04.10.2021 | 1 650 649 (+4 410) | 29 242 (+66) | 1 498 183 |
| 03.10.2021 | 1 646 239 (+4 294) | 29 176 (+65) | 1 496 227 |
| 02.10.2021 | 1 641 945 (+4 032) | 29 111 (+67) | 1 494 342 |
| 01.10.2021 | 1 637 913 (+3 993) | 29 044 (+64) | 1 492 226 |
| 30.09.2021 | 1 633 920 (+3 998) | 28 980 (+62) | 1 490 037 |
| 29.09.2021 | 1 629 922 (+3 004) | 28 918 (+65) | 1 487 800 |
| 28.09.2021 | 1 626 918 (+2 541) | 28 853 (+63) | 1 485 862 |
| 27.09.2021 | 1 624 377 (+3 387) | 28 790 (+61) | 1 483 976 |
| 26.09.2021 | 1 620 990 (+3 275) | 28 729 (+59) | 1 482 416 |
| 25.09.2021 | 1 617 715 (+3 211) | 28 670 (+63) | 1 481 203 |
| 24.09.2021 | 1 614 504 (+2 893) | 28 607 (+56) | 1 479 958 |
| 23.09.2021 | 1 611 611 (+3 445) | 28 551 (+54) | 1 478 681 |
| 22.09.2021 | 1 608 166 (+1 991) | 28 497 (+50) | 1 477 350 |
| 21.09.2021 | 1 606 175 (+1 926) | 28 447 (+52) | 1 475 997 |
| 20.09.2021 | 1 604 249 (+2 469) | 28 395 (+48) | 1 474 697 |
| 19.09.2021 | 1 601 780 (+2 376) | 28 347 (+49) | 1 473 474 |
| 18.09.2021 | 1 599 404 (+2 746) | 28 298 (+51) | 1 472 259 |
| 17.09.2021 | 1 596 658 (+2 537) | 28 247 (+42) | 1 470 979 |
| 16.09.2021 | 1 594 121 (+2 479) | 28 205 (+45) | 1 469 620 |
| 15.09.2021 | 1 591 642 (+1 838) | 28 160 (+49) | 1 468 151 |
| 14.09.2021 | 1 589 804 (+1 609) | 28 111 (+47) | 1 466 721 |
| 13.09.2021 | 1 588 195 (+2 022) | 28 064 (+41) | 1 465 359 |
| 12.09.2021 | 1 586 173 (+1 592) | 28 023 (+42) | 1 464 100 |

|            |                    |              |           |
|------------|--------------------|--------------|-----------|
| 11.09.2021 | 1 584 581 (+1 940) | 27 981 (+46) | 1 462 853 |
| 10.09.2021 | 1 582 641 (+1 566) | 27 935 (+48) | 1 461 536 |
| 09.09.2021 | 1 581 075 (+1 801) | 27 887 (+52) | 1 460 093 |
| 08.09.2021 | 1 579 274 (+1 269) | 27 835 (+48) | 1 458 632 |
| 07.09.2021 | 1 578 005 (+1 187) | 27 787 (+45) | 1 457 119 |
| 06.09.2021 | 1 576 818 (+1 463) | 27 742 (+46) | 1 455 678 |
| 05.09.2021 | 1 575 355 (+1 542) | 27 696 (+48) | 1 454 400 |
| 04.09.2021 | 1 573 813 (+1 549) | 27 648 (+55) | 1 453 242 |
| 03.09.2021 | 1 572 264 (+1 633) | 27 593 (+50) | 1 451 886 |
| 02.09.2021 | 1 570 631 (+1 864) | 27 543 (+51) | 1 450 330 |
| 01.09.2021 | 1 568 767 (+1 229) | 27 492 (+47) | 1 448 644 |
| 31.08.2021 | 1 567 538 (+1 162) | 27 445 (+44) | 1 446 708 |
| 30.08.2021 | 1 566 376 (+1 424) | 27 401 (+50) | 1 444 794 |
| 29.08.2021 | 1 564 952 (+1 444) | 27 351 (+52) | 1 442 955 |
| 28.08.2021 | 1 563 508 (+1 498) | 27 299 (+55) | 1 441 166 |
| 27.08.2021 | 1 562 010 (+1 509) | 27 244 (+51) | 1 439 126 |
| 26.08.2021 | 1 560 501 (+1 712) | 27 193 (+54) | 1 436 829 |
| 25.08.2021 | 1 558 789 (+1 402) | 27 139 (+52) | 1 434 366 |
| 24.08.2021 | 1 557 387 (+1 105) | 27 087 (+56) | 1 432 067 |
| 23.08.2021 | 1 556 282 (+1 458) | 27 031 (+53) | 1 429 919 |
| 22.08.2021 | 1 554 824 (+1 661) | 26 978 (+51) | 1 427 913 |
| 21.08.2021 | 1 553 163 (+1 852) | 26 927 (+55) | 1 425 773 |
| 20.08.2021 | 1 551 311 (+1 925) | 26 872 (+52) | 1 423 229 |
| 19.08.2021 | 1 549 386 (+2 142) | 26 820 (+54) | 1 420 630 |
| 18.08.2021 | 1 547 244 (+1 590) | 26 766 (+59) | 1 417 825 |
| 17.08.2021 | 1 545 654 (+2 006) | 26 707 (+56) | 1 414 796 |
| 16.08.2021 | 1 543 648 (+1 489) | 26 651 (+54) | 1 412 329 |
| 15.08.2021 | 1 542 159 (+1 954) | 26 597 (+58) | 1 410 177 |
| 14.08.2021 | 1 540 205 (+2 317) | 26 539 (+57) | 1 407 723 |
| 13.08.2021 | 1 537 888 (+2 529) | 26 482 (+59) | 1 404 879 |
| 12.08.2021 | 1 535 359 (+2 294) | 26 423 (+56) | 1 401 836 |
| 11.08.2021 | 1 533 065 (+2 076) | 26 367 (+58) | 1 398 507 |
| 10.08.2021 | 1 530 989 (+1 639) | 26 309 (+61) | 1 395 285 |
| 09.08.2021 | 1 529 350 (+2 150) | 26 248 (+59) | 1 392 213 |
| 08.08.2021 | 1 527 200 (+2 761) | 26 189 (+63) | 1 389 595 |
| 07.08.2021 | 1 524 439 (+2 235) | 26 126 (+67) | 1 386 543 |
| 06.08.2021 | 1 522 204 (+2 583) | 26 059 (+65) | 1 382 967 |
| 05.08.2021 | 1 519 621 (+3 227) | 25 994 (+68) | 1 378 924 |
| 04.08.2021 | 1 516 394 (+2 502) | 25 926 (+76) | 1 374 447 |

|            |                    |               |           |
|------------|--------------------|---------------|-----------|
| 03.08.2021 | 1 513 892 (+1 952) | 25 850 (+71)  | 1 370 145 |
| 02.08.2021 | 1 511 940 (+3 330) | 25 779 (+75)  | 1 366 386 |
| 01.08.2021 | 1 508 610 (+2 484) | 25 704 (+78)  | 1 363 505 |
| 31.07.2021 | 1 506 126 (+3 514) | 25 626 (+73)  | 1 360 030 |
| 30.07.2021 | 1 502 612 (+3 481) | 25 553 (+76)  | 1 355 871 |
| 29.07.2021 | 1 499 131 (+3 356) | 25 477 (+79)  | 1 351 297 |
| 28.07.2021 | 1 495 775 (+2 445) | 25 398 (+93)  | 1 346 237 |
| 27.07.2021 | 1 493 330 (+2 623) | 25 305 (+98)  | 1 341 106 |
| 26.07.2021 | 1 490 707 (+2 629) | 25 207 (+101) | 1 336 194 |
| 25.07.2021 | 1 488 078 (+3 406) | 25 106 (+103) | 1 331 614 |
| 24.07.2021 | 1 484 672 (+3 376) | 25 003 (+105) | 1 326 132 |
| 23.07.2021 | 1 481 296 (+3 425) | 24 898 (+107) | 1 319 555 |
| 22.07.2021 | 1 477 871 (+4 287) | 24 791 (+102) | 1 312 545 |
| 21.07.2021 | 1 473 584 (+3 254) | 24 689 (+104) | 1 304 958 |
| 20.07.2021 | 1 470 330 (+3 188) | 24 585 (+101) | 1 296 952 |
| 19.07.2021 | 1 467 142 (+4 007) | 24 484 (+103) | 1 288 984 |
| 18.07.2021 | 1 463 135 (+4 357) | 24 381 (+106) | 1 281 319 |
| 17.07.2021 | 1 458 778 (+4 561) | 24 275 (+102) | 1 274 036 |
| 16.07.2021 | 1 454 217 (+5 382) | 24 173 (+105) | 1 266 393 |
| 15.07.2021 | 1 448 835 (+5 237) | 24 068 (+101) | 1 258 361 |
| 14.07.2021 | 1 443 598 (+3 966) | 23 967 (+109) | 1 250 506 |
| 13.07.2021 | 1 439 632 (+4 991) | 23 858 (+103) | 1 242 987 |
| 12.07.2021 | 1 434 641 (+5 403) | 23 755 (+107) | 1 235 697 |
| 11.07.2021 | 1 429 238 (+5 410) | 23 648 (+110) | 1 228 601 |
| 10.07.2021 | 1 423 828 (+5 694) | 23 538 (+108) | 1 221 766 |
| 09.07.2021 | 1 418 134 (+6 643) | 23 430 (+102) | 1 214 731 |
| 08.07.2021 | 1 411 491 (+6 040) | 23 328 (+109) | 1 207 500 |
| 07.07.2021 | 1 405 451 (+5 621) | 23 219 (+104) | 1 200 695 |
| 06.07.2021 | 1 399 830 (+5 498) | 23 115 (+114) | 1 194 207 |
| 05.07.2021 | 1 394 332 (+6 557) | 23 001 (+106) | 1 188 188 |
| 04.07.2021 | 1 387 775 (+7 624) | 22 895 (+111) | 1 182 540 |
| 03.07.2021 | 1 380 151 (+7 446) | 22 784 (+116) | 1 176 793 |
| 02.07.2021 | 1 372 705 (+6 893) | 22 668 (+112) | 1 170 924 |
| 01.07.2021 | 1 365 812 (+7 597) | 22 556 (+108) | 1 164 653 |
| 30.06.2021 | 1 358 215 (+5 823) | 22 448 (+117) | 1 158 719 |
| 29.06.2021 | 1 352 392 (+6 209) | 22 331 (+121) | 1 153 145 |
| 28.06.2021 | 1 346 183 (+7 246) | 22 210 (+124) | 1 148 291 |
| 27.06.2021 | 1 338 937 (+6 723) | 22 086 (+114) | 1 143 858 |
| 26.06.2021 | 1 332 214 (+8 457) | 21 972 (+96)  | 1 139 840 |

|            |                    |              |           |
|------------|--------------------|--------------|-----------|
| 25.06.2021 | 1 323 757 (+7 916) | 21 876 (+98) | 1 135 580 |
| 24.06.2021 | 1 315 841 (+8 598) | 21 778 (+92) | 1 131 022 |
| 23.06.2021 | 1 307 243 (+6 534) | 21 686 (+88) | 1 126 965 |
| 22.06.2021 | 1 300 709 (+6 555) | 21 598 (+86) | 1 123 295 |
| 21.06.2021 | 1 294 154 (+7 584) | 21 512 (+79) | 1 119 837 |
| 20.06.2021 | 1 286 570 (+8 305) | 21 433 (+81) | 1 116 739 |
| 19.06.2021 | 1 278 265 (+9 120) | 21 352 (+76) | 1 113 794 |
| 18.06.2021 | 1 269 145 (+9 056) | 21 276 (+78) | 1 110 399 |
| 17.06.2021 | 1 260 089 (+6 195) | 21 198 (+73) | 1 106 615 |
| 16.06.2021 | 1 253 894 (+5 782) | 21 125 (+75) | 1 102 979 |
| 15.06.2021 | 1 248 112 (+6 805) | 21 050 (+71) | 1 099 598 |
| 14.06.2021 | 1 241 307 (+6 590) | 20 979 (+72) | 1 096 553 |
| 13.06.2021 | 1 234 717 (+7 704) | 20 907 (+69) | 1 093 738 |
| 12.06.2021 | 1 227 013 (+6 701) | 20 838 (+67) | 1 090 700 |
| 11.06.2021 | 1 220 312 (+5 853) | 20 771 (+60) | 1 087 975 |
| 10.06.2021 | 1 214 459 (+5 245) | 20 711 (+63) | 1 084 914 |
| 09.06.2021 | 1 209 214 (+4 124) | 20 648 (+58) | 1 082 243 |
| 08.06.2021 | 1 205 090 (+3 817) | 20 590 (+62) | 1 079 932 |
| 07.06.2021 | 1 201 273 (+3 266) | 20 528 (+59) | 1 077 914 |
| 06.06.2021 | 1 198 007 (+2 936) | 20 469 (+61) | 1 076 346 |
| 05.06.2021 | 1 195 071 (+2 897) | 20 408 (+56) | 1 074 605 |
| 04.06.2021 | 1 192 174 (+2 817) | 20 352 (+58) | 1 072 425 |
| 03.06.2021 | 1 189 357 (+2 876) | 20 294 (+57) | 1 070 107 |
| 02.06.2021 | 1 186 481 (+2 842) | 20 237 (+60) | 1 067 425 |
| 01.06.2021 | 1 183 639 (+3 669) | 20 177 (+62) | 1 064 858 |
| 31.05.2021 | 1 179 970 (+2 614) | 20 115 (+55) | 1 062 465 |
| 30.05.2021 | 1 177 356 (+3 719) | 20 060 (+59) | 1 060 588 |
| 29.05.2021 | 1 173 637 (+3 241) | 20 001 (+61) | 1 058 041 |
| 28.05.2021 | 1 170 396 (+3 274) | 19 940 (+56) | 1 055 130 |
| 27.05.2021 | 1 167 122 (+3 105) | 19 884 (+58) | 1 052 132 |
| 26.05.2021 | 1 164 017 (+2 416) | 19 826 (+62) | 1 049 246 |
| 25.05.2021 | 1 161 601 (+2 075) | 19 764 (+57) | 1 046 726 |
| 24.05.2021 | 1 159 526 (+2 487) | 19 707 (+59) | 1 044 518 |
| 23.05.2021 | 1 157 039 (+2 924) | 19 648 (+56) | 1 042 788 |
| 22.05.2021 | 1 154 115 (+2 653) | 19 592 (+60) | 1 040 760 |
| 21.05.2021 | 1 151 462 (+2 954) | 19 532 (+58) | 1 038 332 |
| 20.05.2021 | 1 148 508 (+3 312) | 19 474 (+55) | 1 035 739 |
| 19.05.2021 | 1 145 196 (+2 096) | 19 419 (+61) | 1 032 862 |
| 18.05.2021 | 1 143 100 (+2 430) | 19 358 (+59) | 1 030 199 |



|            |                    |              |           |
|------------|--------------------|--------------|-----------|
| 17.05.2021 | 1 140 670 (+3 573) | 19 299 (+57) | 1 027 835 |
| 16.05.2021 | 1 137 097 (+2 789) | 19 242 (+56) | 1 025 794 |
| 15.05.2021 | 1 134 308 (+3 073) | 19 186 (+58) | 1 023 380 |
| 14.05.2021 | 1 131 235 (+3 818) | 19 128 (+60) | 1 020 683 |
| 13.05.2021 | 1 127 417 (+2 787) | 19 068 (+55) | 1 017 740 |
| 12.05.2021 | 1 124 630 (+2 718) | 19 013 (+59) | 1 015 097 |
| 11.05.2021 | 1 121 912 (+2 628) | 18 954 (+61) | 1 012 703 |
| 10.05.2021 | 1 119 284 (+2 896) | 18 893 (+56) | 1 010 652 |
| 09.05.2021 | 1 116 388 (+2 828) | 18 837 (+58) | 1 008 676 |
| 08.05.2021 | 1 113 560 (+2 765) | 18 779 (+57) | 1 006 542 |
| 07.05.2021 | 1 110 795 (+2 846) | 18 722 (+60) | 1 004 060 |
| 06.05.2021 | 1 107 949 (+2 114) | 18 662 (+59) | 1 001 798 |
| 05.05.2021 | 1 105 835 (+2 432) | 18 603 (+56) | 999 742   |
| 04.05.2021 | 1 103 403 (+2 050) | 18 547 (+61) | 997 957   |
| 03.05.2021 | 1 101 353 (+2 635) | 18 486 (+58) | 996 373   |
| 02.05.2021 | 1 098 718 (+2 699) | 18 428 (+54) | 994 965   |
| 01.05.2021 | 1 096 019 (+3 208) | 18 374 (+59) | 993 348   |
| 30.04.2021 | 1 092 811 (+2 662) | 18 315 (+57) | 991 419   |
| 29.04.2021 | 1 090 149 (+3 215) | 18 258 (+56) | 989 411   |
| 28.04.2021 | 1 086 934 (+1 840) | 18 202 (+54) | 987 457   |
| 27.04.2021 | 1 085 094 (+2 098) | 18 148 (+58) | 985 769   |
| 26.04.2021 | 1 082 996 (+2 687) | 18 090 (+55) | 984 346   |
| 25.04.2021 | 1 080 309 (+2 526) | 18 035 (+53) | 983 221   |
| 24.04.2021 | 1 077 783 (+2 541) | 17 982 (+59) | 981 882   |
| 23.04.2021 | 1 075 242 (+2 502) | 17 923 (+57) | 980 003   |
| 22.04.2021 | 1 072 740 (+2 704) | 17 866 (+54) | 977 880   |
| 21.04.2021 | 1 070 036 (+1 988) | 17 812 (+58) | 975 973   |
| 20.04.2021 | 1 068 048 (+1 996) | 17 754 (+56) | 974 229   |
| 19.04.2021 | 1 066 052 (+2 279) | 17 698 (+59) | 972 646   |
| 18.04.2021 | 1 063 773 (+2 252) | 17 639 (+53) | 971 557   |
| 17.04.2021 | 1 061 521 (+2 822) | 17 586 (+58) | 970 320   |
| 16.04.2021 | 1 058 699 (+2 476) | 17 528 (+57) | 968 682   |
| 15.04.2021 | 1 056 223 (+2 455) | 17 471 (+59) | 966 781   |
| 14.04.2021 | 1 053 768 (+1 837) | 17 412 (+52) | 964 837   |
| 13.04.2021 | 1 051 931 (+1 782) | 17 360 (+58) | 963 086   |
| 12.04.2021 | 1 050 149 (+1 833) | 17 302 (+54) | 961 392   |
| 11.04.2021 | 1 048 316 (+2 090) | 17 248 (+56) | 960 171   |
| 10.04.2021 | 1 046 226 (+2 006) | 17 192 (+53) | 958 783   |
| 09.04.2021 | 1 044 220 (+2 421) | 17 139 (+57) | 957 137   |

|            |                    |              |         |
|------------|--------------------|--------------|---------|
| 08.04.2021 | 1 041 799 (+2 024) | 17 082 (+55) | 955 148 |
| 07.04.2021 | 1 039 775 (+1 585) | 17 027 (+51) | 953 402 |
| 06.04.2021 | 1 038 190 (+1 747) | 16 976 (+54) | 951 851 |
| 05.04.2021 | 1 036 443 (+1 876) | 16 922 (+50) | 950 658 |
| 04.04.2021 | 1 034 567 (+1 901) | 16 872 (+56) | 949 843 |
| 03.04.2021 | 1 032 666 (+2 011) | 16 816 (+52) | 948 845 |
| 02.04.2021 | 1 030 655 (+1 764) | 16 764 (+57) | 947 694 |
| 01.04.2021 | 1 028 891 (+2 151) | 16 707 (+51) | 946 370 |
| 31.03.2021 | 1 026 740 (+1 286) | 16 656 (+53) | 944 738 |
| 30.03.2021 | 1 025 454 (+1 291) | 16 603 (+56) | 943 201 |
| 29.03.2021 | 1 024 163 (+1 612) | 16 547 (+49) | 942 036 |
| 28.03.2021 | 1 022 551 (+1 878) | 16 498 (+52) | 941 192 |
| 27.03.2021 | 1 020 673 (+1 551) | 16 446 (+54) | 940 041 |
| 26.03.2021 | 1 019 122 (+1 813) | 16 392 (+55) | 938 673 |
| 25.03.2021 | 1 017 309 (+1 787) | 16 337 (+49) | 937 122 |
| 24.03.2021 | 1 015 522 (+1 431) | 16 288 (+53) | 935 400 |
| 23.03.2021 | 1 014 091 (+1 042) | 16 235 (+51) | 933 807 |
| 22.03.2021 | 1 013 049 (+1 586) | 16 184 (+56) | 932 428 |
| 21.03.2021 | 1 011 463 (+1 511) | 16 128 (+50) | 931 296 |
| 20.03.2021 | 1 009 952 (+1 728) | 16 078 (+54) | 929 925 |
| 19.03.2021 | 1 008 224 (+1 809) | 16 024 (+51) | 928 156 |
| 18.03.2021 | 1 006 415 (+1 934) | 15 973 (+48) | 926 254 |
| 17.03.2021 | 1 004 481 (+1 201) | 15 925 (+53) | 924 494 |
| 16.03.2021 | 1 003 280 (+1 533) | 15 872 (+57) | 922 899 |
| 15.03.2021 | 1 001 747 (+1 353) | 15 815 (+51) | 921 424 |
| 14.03.2021 | 1 000 394 (+1 905) | 15 764 (+55) | 920 388 |
| 13.03.2021 | 998 489 (+1 600)   | 15 709 (+52) | 919 278 |
| 12.03.2021 | 996 889 (+1 610)   | 15 657 (+56) | 917 809 |
| 11.03.2021 | 995 279 (+1 281)   | 15 601 (+54) | 916 204 |
| 10.03.2021 | 993 998 (+1 116)   | 15 547 (+51) | 914 626 |
| 09.03.2021 | 992 882 (+1 066)   | 15 496 (+49) | 913 173 |
| 08.03.2021 | 991 816 (+1 421)   | 15 447 (+53) | 912 146 |
| 07.03.2021 | 990 395 (+1 534)   | 15 394 (+47) | 911 109 |
| 06.03.2021 | 988 861 (+1 820)   | 15 347 (+50) | 909 692 |
| 05.03.2021 | 987 041 (+1 757)   | 15 297 (+54) | 907 770 |
| 04.03.2021 | 985 284 (+2 150)   | 15 243 (+51) | 905 521 |
| 03.03.2021 | 983 134 (+1 284)   | 15 192 (+46) | 903 100 |
| 02.03.2021 | 981 850 (+1 277)   | 15 146 (+49) | 901 035 |
| 01.03.2021 | 980 573 (+2 097)   | 15 097 (+42) | 899 239 |

|            |                  |              |         |
|------------|------------------|--------------|---------|
| 28.02.2021 | 978 476 (+1 737) | 15 055 (+48) | 897 698 |
| 27.02.2021 | 976 739 (+1 825) | 15 007 (+41) | 895 879 |
| 26.02.2021 | 974 914 (+1 336) | 14 966 (+45) | 893 871 |
| 25.02.2021 | 973 578 (+1 406) | 14 921 (+47) | 891 448 |
| 24.02.2021 | 972 172 (+1 417) | 14 874 (+43) | 889 356 |
| 23.02.2021 | 970 755 (+1 198) | 14 831 (+49) | 887 637 |
| 22.02.2021 | 969 557 (+1 723) | 14 782 (+41) | 886 273 |
| 21.02.2021 | 967 834 (+1 602) | 14 741 (+52) | 884 615 |
| 20.02.2021 | 966 232 (+1 623) | 14 689 (+58) | 882 808 |
| 19.02.2021 | 964 609 (+1 972) | 14 631 (+53) | 880 767 |
| 18.02.2021 | 962 637 (+1 950) | 14 578 (+55) | 878 655 |
| 17.02.2021 | 960 687 (+1 282) | 14 523 (+59) | 876 141 |
| 16.02.2021 | 959 405 (+1 409) | 14 464 (+60) | 873 898 |
| 15.02.2021 | 957 996 (+1 818) | 14 404 (+56) | 871 836 |
| 14.02.2021 | 956 178 (+1 559) | 14 348 (+58) | 869 869 |
| 13.02.2021 | 954 619 (+1 963) | 14 290 (+67) | 867 780 |
| 12.02.2021 | 952 656 (+2 139) | 14 223 (+63) | 865 100 |
| 11.02.2021 | 950 517 (+2 040) | 14 160 (+61) | 861 916 |
| 10.02.2021 | 948 477 (+1 441) | 14 099 (+68) | 858 358 |
| 09.02.2021 | 947 036 (+1 584) | 14 031 (+73) | 854 725 |
| 08.02.2021 | 945 452 (+1 728) | 13 958 (+62) | 851 171 |
| 07.02.2021 | 943 724 (+2 028) | 13 896 (+64) | 847 822 |
| 06.02.2021 | 941 696 (+2 214) | 13 832 (+60) | 844 165 |
| 05.02.2021 | 939 482 (+2 032) | 13 772 (+71) | 839 832 |
| 04.02.2021 | 937 450 (+2 095) | 13 701 (+67) | 835 168 |
| 03.02.2021 | 935 355 (+1 545) | 13 634 (+65) | 829 844 |
| 02.02.2021 | 933 810 (+1 701) | 13 569 (+74) | 824 623 |
| 01.02.2021 | 932 109 (+2 037) | 13 495 (+61) | 819 611 |
| 31.01.2021 | 930 072 (+2 284) | 13 434 (+66) | 814 728 |
| 30.01.2021 | 927 788 (+2 430) | 13 368 (+68) | 809 226 |
| 29.01.2021 | 925 358 (+2 799) | 13 300 (+63) | 803 642 |
| 28.01.2021 | 922 559 (+2 897) | 13 237 (+62) | 797 462 |
| 27.01.2021 | 919 662 (+1 837) | 13 175 (+75) | 791 320 |
| 26.01.2021 | 917 825 (+2 317) | 13 100 (+70) | 785 396 |
| 25.01.2021 | 915 508 (+2 382) | 13 030 (+61) | 779 824 |
| 24.01.2021 | 913 126 (+3 069) | 12 969 (+74) | 774 550 |
| 23.01.2021 | 910 057 (+2 668) | 12 895 (+64) | 769 433 |
| 22.01.2021 | 907 389 (+3 037) | 12 831 (+72) | 763 500 |
| 21.01.2021 | 904 352 (+3 458) | 12 759 (+69) | 757 871 |

|            |                  |              |         |
|------------|------------------|--------------|---------|
| 20.01.2021 | 900 894 (+2 452) | 12 690 (+65) | 752 651 |
| 19.01.2021 | 898 442 (+3 115) | 12 625 (+84) | 747 881 |
| 18.01.2021 | 895 327 (+3 679) | 12 541 (+73) | 743 349 |
| 17.01.2021 | 891 648 (+4 012) | 12 468 (+67) | 739 340 |
| 16.01.2021 | 887 636 (+4 674) | 12 401 (+79) | 734 728 |
| 15.01.2021 | 882 962 (+5 534) | 12 322 (+81) | 729 089 |
| 14.01.2021 | 877 428 (+5 893) | 12 241 (+68) | 722 487 |
| 13.01.2021 | 871 535 (+4 320) | 12 173 (+76) | 715 438 |
| 12.01.2021 | 867 215 (+5 001) | 12 097 (+72) | 708 568 |
| 11.01.2021 | 862 214 (+4 646) | 12 025 (+75) | 701 790 |
| 10.01.2021 | 857 568 (+4 216) | 11 950 (+77) | 695 106 |
| 09.01.2021 | 853 352 (+4 900) | 11 873 (+74) | 688 061 |
| 08.01.2021 | 848 452 (+5 027) | 11 799 (+71) | 680 759 |
| 07.01.2021 | 843 425 (+4 871) | 11 728 (+76) | 673 692 |
| 06.01.2021 | 838 554 (+5 142) | 11 652 (+70) | 666 282 |
| 05.01.2021 | 833 412 (+4 842) | 11 582 (+75) | 659 076 |
| 04.01.2021 | 828 570 (+3 591) | 11 507 (+74) | 652 324 |
| 03.01.2021 | 824 979 (+3 851) | 11 433 (+77) | 645 923 |
| 02.01.2021 | 821 128 (+5 452) | 11 356 (+76) | 639 809 |
| 01.01.2021 | 815 676 (+5 907) | 11 280 (+71) | 633 702 |
| 31.12.2020 | 809 769 (+6 566) | 11 209 (+73) | 627 368 |
| 30.12.2020 | 803 203 (+5 105) | 11 136 (+72) | 621 292 |
| 29.12.2020 | 798 098 (+5 641) | 11 064 (+75) | 615 396 |
| 28.12.2020 | 792 457 (+6 253) | 10 989 (+76) | 609 770 |
| 27.12.2020 | 786 204 (+6 620) | 10 913 (+73) | 604 604 |
| 26.12.2020 | 779 584 (+7 480) | 10 840 (+77) | 599 541 |
| 25.12.2020 | 772 104 (+7 315) | 10 763 (+74) | 593 939 |
| 24.12.2020 | 764 789 (+8 203) | 10 689 (+76) | 588 280 |
| 23.12.2020 | 756 586 (+5 652) | 10 613 (+73) | 582 772 |
| 22.12.2020 | 750 934 (+7 237) | 10 540 (+71) | 577 544 |
| 21.12.2020 | 743 697 (+7 797) | 10 469 (+75) | 572 541 |
| 20.12.2020 | 735 900 (+7 263) | 10 394 (+77) | 567 743 |
| 19.12.2020 | 728 637 (+6 459) | 10 317 (+74) | 562 953 |
| 18.12.2020 | 722 178 (+6 937) | 10 243 (+72) | 557 028 |
| 17.12.2020 | 715 241 (+6 711) | 10 171 (+76) | 551 207 |
| 16.12.2020 | 708 530 (+5 028) | 10 095 (+73) | 545 430 |
| 15.12.2020 | 703 502 (+5 418) | 10 022 (+77) | 539 859 |
| 14.12.2020 | 698 084 (+5 874) | 9 945 (+75)  | 534 552 |
| 13.12.2020 | 692 210 (+6 425) | 9 870 (+72)  | 529 620 |

|            |                  |             |         |
|------------|------------------|-------------|---------|
| 12.12.2020 | 685 785 (+6 622) | 9 798 (+76) | 524 779 |
| 11.12.2020 | 679 163 (+7 215) | 9 722 (+77) | 518 889 |
| 10.12.2020 | 671 948 (+6 730) | 9 645 (+74) | 512 969 |
| 09.12.2020 | 665 218 (+5 145) | 9 571 (+75) | 507 149 |
| 08.12.2020 | 660 073 (+5 232) | 9 496 (+71) | 501 403 |
| 07.12.2020 | 654 841 (+7 279) | 9 425 (+76) | 495 871 |
| 06.12.2020 | 647 562 (+7 512) | 9 349 (+72) | 490 844 |
| 05.12.2020 | 640 050 (+7 993) | 9 277 (+74) | 485 308 |
| 04.12.2020 | 632 057 (+6 868) | 9 203 (+77) | 478 724 |
| 03.12.2020 | 625 189 (+7 750) | 9 126 (+73) | 471 833 |
| 02.12.2020 | 617 439 (+5 191) | 9 053 (+75) | 464 984 |
| 01.12.2020 | 612 248 (+6 524) | 8 978 (+76) | 458 409 |
| 30.11.2020 | 605 724 (+6 511) | 8 902 (+74) | 452 184 |
| 29.11.2020 | 599 213 (+6 798) | 8 828 (+72) | 447 111 |
| 28.11.2020 | 592 415 (+7 320) | 8 756 (+76) | 441 535 |
| 27.11.2020 | 585 095 (+7 918) | 8 680 (+77) | 434 902 |
| 26.11.2020 | 577 177 (+6 075) | 8 603 (+73) | 428 418 |
| 25.11.2020 | 571 102 (+4 685) | 8 530 (+75) | 422 189 |
| 24.11.2020 | 566 417 (+5 838) | 8 455 (+76) | 416 242 |
| 23.11.2020 | 560 579 (+6 866) | 8 379 (+71) | 410 641 |
| 22.11.2020 | 553 713 (+6 575) | 8 308 (+75) | 405 577 |
| 21.11.2020 | 547 138 (+7 168) | 8 233 (+74) | 400 332 |
| 20.11.2020 | 539 970 (+6 902) | 8 159 (+77) | 394 252 |
| 19.11.2020 | 533 068 (+6 438) | 8 082 (+73) | 388 416 |
| 18.11.2020 | 526 630 (+4 174) | 8 009 (+76) | 382 634 |
| 17.11.2020 | 522 456 (+5 882) | 7 933 (+74) | 377 131 |
| 16.11.2020 | 516 574 (+6 360) | 7 859 (+72) | 371 857 |
| 15.11.2020 | 510 214 (+6 271) | 7 787 (+75) | 367 613 |
| 14.11.2020 | 503 943 (+6 427) | 7 712 (+69) | 363 347 |
| 13.11.2020 | 497 516 (+5 974) | 7 643 (+70) | 358 924 |
| 12.11.2020 | 491 542 (+5 997) | 7 573 (+71) | 354 705 |
| 11.11.2020 | 485 545 (+4 477) | 7 502 (+73) | 350 746 |
| 10.11.2020 | 481 068 (+5 902) | 7 429 (+68) | 346 889 |
| 09.11.2020 | 475 166 (+6 897) | 7 361 (+72) | 343 226 |
| 08.11.2020 | 468 269 (+5 751) | 7 289 (+74) | 339 913 |
| 07.11.2020 | 462 518 (+5 829) | 7 215 (+75) | 336 659 |
| 06.11.2020 | 456 689 (+6 253) | 7 140 (+69) | 332 984 |
| 05.11.2020 | 450 436 (+5 255) | 7 071 (+67) | 329 201 |
| 04.11.2020 | 445 181 (+5 826) | 7 004 (+68) | 325 531 |

|            |                  |             |         |
|------------|------------------|-------------|---------|
| 03.11.2020 | 439 355 (+5 150) | 6 936 (+63) | 321 679 |
| 02.11.2020 | 434 205 (+4 796) | 6 873 (+53) | 318 032 |
| 01.11.2020 | 429 409 (+5 261) | 6 820 (+52) | 314 791 |
| 31.10.2020 | 424 148 (+4 952) | 6 768 (+55) | 311 450 |
| 30.10.2020 | 419 196 (+5 268) | 6 713 (+69) | 307 816 |
| 29.10.2020 | 413 928 (+4 906) | 6 644 (+66) | 303 831 |
| 28.10.2020 | 409 022 (+3 670) | 6 578 (+75) | 300 051 |
| 27.10.2020 | 405 352 (+4 312) | 6 503 (+61) | 296 474 |
| 26.10.2020 | 401 040 (+5 224) | 6 442 (+62) | 293 205 |
| 25.10.2020 | 395 816 (+4 455) | 6 380 (+68) | 290 524 |
| 24.10.2020 | 391 361 (+4 453) | 6 312 (+63) | 287 910 |
| 23.10.2020 | 386 908 (+5 478) | 6 249 (+62) | 285 271 |
| 22.10.2020 | 381 430 (+4 413) | 6 187 (+66) | 282 492 |
| 21.10.2020 | 377 017 (+4 389) | 6 121 (+63) | 279 973 |
| 20.10.2020 | 372 628 (+4 999) | 6 058 (+49) | 277 608 |
| 19.10.2020 | 367 629 (+5 376) | 6 009 (+51) | 275 648 |
| 18.10.2020 | 362 253 (+4 610) | 5 958 (+52) | 273 881 |
| 17.10.2020 | 357 643 (+4 648) | 5 906 (+56) | 272 227 |
| 16.10.2020 | 352 995 (+5 049) | 5 850 (+54) | 270 226 |
| 15.10.2020 | 347 946 (+3 942) | 5 796 (+57) | 268 423 |
| 14.10.2020 | 344 004 (+4 573) | 5 739 (+52) | 266 470 |
| 13.10.2020 | 339 431 (+4 618) | 5 687 (+58) | 264 500 |
| 12.10.2020 | 334 813 (+4 395) | 5 629 (+34) | 262 750 |
| 11.10.2020 | 330 418 (+4 501) | 5 595 (+35) | 261 619 |
| 10.10.2020 | 325 917 (+4 105) | 5 560 (+30) | 260 433 |
| 09.10.2020 | 321 812 (+3 701) | 5 530 (+33) | 259 127 |
| 08.10.2020 | 318 111 (+3 323) | 5 497 (+55) | 257 703 |
| 07.10.2020 | 314 788 (+3 229) | 5 442 (+41) | 256 362 |
| 06.10.2020 | 311 559 (+4 082) | 5 401 (+31) | 255 100 |
| 05.10.2020 | 307 477 (+3 537) | 5 370 (+27) | 253 944 |
| 04.10.2020 | 303 940 (+3 327) | 5 343 (+29) | 253 031 |
| 03.10.2020 | 300 613 (+2 884) | 5 314 (+32) | 252 087 |
| 02.10.2020 | 297 729 (+2 704) | 5 282 (+28) | 251 018 |
| 01.10.2020 | 295 025 (+2 424) | 5 254 (+24) | 249 861 |
| 30.09.2020 | 292 601 (+2 308) | 5 230 (+27) | 248 650 |
| 29.09.2020 | 290 293 (+2 300) | 5 203 (+23) | 247 301 |
| 28.09.2020 | 287 993 (+2 217) | 5 180 (+16) | 246 074 |
| 27.09.2020 | 285 776 (+2 016) | 5 164 (+18) | 245 132 |
| 26.09.2020 | 283 760 (+1 792) | 5 146 (+17) | 244 006 |

|            |                  |             |         |
|------------|------------------|-------------|---------|
| 25.09.2020 | 281 968 (+1 560) | 5 129 (+14) | 242 883 |
| 24.09.2020 | 280 408 (+1 050) | 5 115 (+15) | 241 656 |
| 23.09.2020 | 279 358 (+970)   | 5 100 (+16) | 240 352 |
| 22.09.2020 | 278 388 (+980)   | 5 084 (+15) | 239 126 |
| 21.09.2020 | 277 408 (+915)   | 5 069 (+12) | 237 935 |
| 20.09.2020 | 276 493 (+860)   | 5 057 (+13) | 236 947 |
| 19.09.2020 | 275 633 (+825)   | 5 044 (+11) | 236 055 |
| 18.09.2020 | 274 808 (+805)   | 5 033 (+8)  | 235 136 |
| 17.09.2020 | 274 003 (+730)   | 5 025 (+9)  | 234 029 |
| 16.09.2020 | 273 273 (+750)   | 5 016 (+10) | 232 706 |
| 15.09.2020 | 272 523 (+730)   | 5 006 (+13) | 231 483 |
| 14.09.2020 | 271 793 (+696)   | 4 993 (+11) | 230 397 |
| 13.09.2020 | 271 097 (+650)   | 4 982 (+14) | 229 573 |
| 12.09.2020 | 270 447 (+670)   | 4 968 (+12) | 228 673 |
| 11.09.2020 | 269 777 (+698)   | 4 956 (+9)  | 227 530 |
| 10.09.2020 | 269 079 (+695)   | 4 947 (+14) | 226 274 |
| 09.09.2020 | 268 384 (+642)   | 4 933 (+12) | 224 840 |
| 08.09.2020 | 267 742 (+695)   | 4 921 (+16) | 223 502 |
| 07.09.2020 | 267 047 (+690)   | 4 905 (+14) | 222 252 |
| 06.09.2020 | 266 357 (+620)   | 4 891 (+13) | 221 370 |
| 05.09.2020 | 265 737 (+671)   | 4 878 (+11) | 220 407 |
| 04.09.2020 | 265 066 (+692)   | 4 867 (+10) | 219 095 |
| 03.09.2020 | 264 374 (+690)   | 4 857 (+13) | 217 899 |
| 02.09.2020 | 263 684 (+625)   | 4 844 (+12) | 216 742 |
| 01.09.2020 | 263 059 (+641)   | 4 832 (+11) | 215 383 |
| 31.08.2020 | 262 418 (+685)   | 4 821 (+12) | 214 121 |
| 30.08.2020 | 261 733 (+695)   | 4 809 (+11) | 213 205 |
| 29.08.2020 | 261 038 (+677)   | 4 798 (+12) | 212 301 |
| 28.08.2020 | 260 361 (+654)   | 4 786 (+10) | 210 908 |
| 27.08.2020 | 259 707 (+637)   | 4 776 (+12) | 209 628 |
| 26.08.2020 | 259 070 (+640)   | 4 764 (+11) | 208 193 |
| 25.08.2020 | 258 430 (+681)   | 4 753 (+12) | 206 804 |
| 24.08.2020 | 257 749 (+625)   | 4 741 (+10) | 205 649 |
| 23.08.2020 | 257 124 (+611)   | 4 731 (+11) | 204 786 |
| 22.08.2020 | 256 513 (+687)   | 4 720 (+10) | 203 821 |
| 21.08.2020 | 255 826 (+690)   | 4 710 (+12) | 202 727 |
| 20.08.2020 | 255 136 (+688)   | 4 698 (+11) | 201 567 |
| 19.08.2020 | 254 448 (+691)   | 4 687 (+10) | 200 359 |
| 18.08.2020 | 253 757 (+693)   | 4 677 (+11) | 199 117 |

|            |                |             |         |
|------------|----------------|-------------|---------|
| 17.08.2020 | 253 064 (+690) | 4 666 (+10) | 197 962 |
| 16.08.2020 | 252 374 (+688) | 4 656 (+11) | 197 143 |
| 15.08.2020 | 251 686 (+695) | 4 645 (+12) | 196 098 |
| 14.08.2020 | 250 991 (+688) | 4 633 (+11) | 194 823 |
| 13.08.2020 | 250 303 (+692) | 4 622 (+11) | 193 473 |
| 12.08.2020 | 249 611 (+689) | 4 611 (+12) | 192 686 |
| 11.08.2020 | 248 922 (+694) | 4 599 (+14) | 191 598 |
| 10.08.2020 | 248 228 (+694) | 4 585 (+13) | 190 555 |
| 09.08.2020 | 247 534 (+689) | 4 572 (+12) | 189 657 |
| 08.08.2020 | 246 845 (+691) | 4 560 (+14) | 188 854 |
| 07.08.2020 | 246 154 (+686) | 4 546 (+12) | 187 576 |
| 06.08.2020 | 245 468 (+684) | 4 534 (+13) | 186 223 |
| 05.08.2020 | 244 784 (+687) | 4 521 (+11) | 184 969 |
| 04.08.2020 | 244 097 (+691) | 4 510 (+12) | 183 640 |
| 03.08.2020 | 243 406 (+693) | 4 498 (+13) | 182 184 |
| 02.08.2020 | 242 713 (+664) | 4 485 (+12) | 181 342 |
| 01.08.2020 | 242 049 (+690) | 4 473 (+13) | 180 581 |
| 31.07.2020 | 241 359 (+695) | 4 460 (+14) | 179 168 |
| 30.07.2020 | 240 664 (+678) | 4 446 (+12) | 177 908 |
| 29.07.2020 | 239 986 (+671) | 4 434 (+13) | 176 437 |
| 28.07.2020 | 239 315 (+674) | 4 421 (+10) | 175 812 |
| 27.07.2020 | 238 641 (+694) | 4 411 (+13) | 174 985 |
| 26.07.2020 | 237 947 (+683) | 4 398 (+9)  | 174 721 |
| 25.07.2020 | 237 264 (+648) | 4 389 (+14) | 174 415 |
| 24.07.2020 | 236 616 (+645) | 4 375 (+11) | 173 854 |
| 23.07.2020 | 235 971 (+608) | 4 364 (+14) | 173 392 |
| 22.07.2020 | 235 363 (+638) | 4 350 (+19) | 172 939 |
| 21.07.2020 | 234 725 (+602) | 4 331 (+17) | 171 771 |
| 20.07.2020 | 234 123 (+578) | 4 314 (+15) | 170 918 |
| 19.07.2020 | 233 545 (+591) | 4 299 (+14) | 170 539 |
| 18.07.2020 | 232 954 (+578) | 4 285 (+14) | 170 180 |
| 17.07.2020 | 232 376 (+575) | 4 271 (+13) | 169 637 |
| 16.07.2020 | 231 801 (+531) | 4 258 (+24) | 168 955 |
| 15.07.2020 | 231 270 (+628) | 4 234 (+29) | 167 810 |
| 14.07.2020 | 230 642 (+613) | 4 205 (+37) | 165 966 |
| 13.07.2020 | 230 029 (+672) | 4 168 (+25) | 164 954 |
| 12.07.2020 | 229 357 (+679) | 4 143 (+27) | 164 560 |
| 11.07.2020 | 228 678 (+678) | 4 116 (+29) | 164 095 |
| 10.07.2020 | 228 000 (+637) | 4 087 (+28) | 163 093 |



|            |                  |             |         |
|------------|------------------|-------------|---------|
| 09.07.2020 | 227 363 (+568)   | 4 059 (+32) | 162 086 |
| 08.07.2020 | 226 795 (+621)   | 4 027 (+28) | 160 913 |
| 07.07.2020 | 226 174 (+629)   | 3 999 (+24) | 159 718 |
| 06.07.2020 | 225 545 (+685)   | 3 975 (+22) | 157 652 |
| 05.07.2020 | 224 860 (+650)   | 3 953 (+24) | 157 020 |
| 04.07.2020 | 224 210 (+680)   | 3 929 (+25) | 156 459 |
| 03.07.2020 | 223 530 (+659)   | 3 904 (+34) | 154 839 |
| 02.07.2020 | 222 871 (+662)   | 3 870 (+39) | 153 248 |
| 01.07.2020 | 222 209 (+611)   | 3 831 (+35) | 152 193 |
| 30.06.2020 | 221 598 (+745)   | 3 796 (+35) | 150 397 |
| 29.06.2020 | 220 853 (+782)   | 3 761 (+23) | 148 102 |
| 28.06.2020 | 220 071 (+717)   | 3 738 (+24) | 147 095 |
| 27.06.2020 | 219 354 (+750)   | 3 714 (+20) | 146 043 |
| 26.06.2020 | 218 604 (+813)   | 3 694 (+25) | 144 191 |
| 25.06.2020 | 217 791 (+885)   | 3 669 (+12) | 142 194 |
| 24.06.2020 | 216 906 (+811)   | 3 657 (+14) | 141 268 |
| 23.06.2020 | 216 095 (+1 081) | 3 643 (+26) | 139 248 |
| 22.06.2020 | 215 014 (+1 068) | 3 617 (+20) | 136 670 |
| 21.06.2020 | 213 946 (+968)   | 3 597 (+32) | 135 556 |
| 20.06.2020 | 212 978 (+1 057) | 3 565 (+34) | 134 549 |
| 19.06.2020 | 211 921 (+1 136) | 3 531 (+48) | 132 434 |
| 18.06.2020 | 210 785 (+1 040) | 3 483 (+49) | 130 431 |
| 17.06.2020 | 209 745 (+1 065) | 3 434 (+48) | 128 385 |
| 16.06.2020 | 208 680 (+1 416) | 3 386 (+52) | 126 114 |
| 15.06.2020 | 207 264 (+1 359) | 3 334 (+53) | 123 240 |
| 14.06.2020 | 205 905 (+1 477) | 3 281 (+50) | 121 691 |
| 13.06.2020 | 204 428 (+1 493) | 3 231 (+44) | 119 558 |
| 12.06.2020 | 202 935 (+1 714) | 3 187 (+49) | 118 024 |
| 11.06.2020 | 201 221 (+1 436) | 3 138 (+53) | 115 769 |
| 10.06.2020 | 199 785 (+1 195) | 3 085 (+56) | 113 533 |
| 09.06.2020 | 198 590 (+1 572) | 3 029 (+59) | 109 737 |
| 08.06.2020 | 197 018 (+2 001) | 2 970 (+51) | 104 347 |
| 07.06.2020 | 195 017 (+1 956) | 2 919 (+55) | 102 714 |
| 06.06.2020 | 193 061 (+1 992) | 2 864 (+58) | 100 431 |
| 05.06.2020 | 191 069 (+1 855) | 2 806 (+57) | 97 358  |
| 04.06.2020 | 189 214 (+1 998) | 2 749 (+64) | 94 715  |
| 03.06.2020 | 187 216 (+1 842) | 2 685 (+61) | 91 654  |
| 02.06.2020 | 185 374 (+2 286) | 2 624 (+71) | 88 269  |
| 01.06.2020 | 183 088 (+2 297) | 2 553 (+76) | 82 239  |

|            |                  |             |        |
|------------|------------------|-------------|--------|
| 31.05.2020 | 180 791 (+2 595) | 2 477 (+69) | 80 179 |
| 30.05.2020 | 178 196 (+2 367) | 2 408 (+78) | 78 324 |
| 29.05.2020 | 175 829 (+2 332) | 2 330 (+76) | 74 725 |
| 28.05.2020 | 173 497 (+2 054) | 2 254 (+71) | 71 251 |
| 27.05.2020 | 171 443 (+2 140) | 2 183 (+73) | 67 458 |
| 26.05.2020 | 169 303 (+2 830) | 2 110 (+76) | 61 619 |
| 25.05.2020 | 166 473 (+2 560) | 2 034 (+41) | 53 586 |
| 24.05.2020 | 163 913 (+2 516) | 1 993 (+59) | 49 840 |
| 23.05.2020 | 161 397 (+3 190) | 1 934 (+67) | 47 413 |
| 22.05.2020 | 158 207 (+2 988) | 1 867 (+73) | 43 582 |
| 21.05.2020 | 155 219 (+2 913) | 1 794 (+68) | 40 682 |
| 20.05.2020 | 152 306 (+2 699) | 1 726 (+75) | 36 936 |
| 19.05.2020 | 149 607 (+3 545) | 1 651 (+71) | 31 496 |
| 18.05.2020 | 146 062 (+3 238) | 1 580 (+77) | 28 913 |
| 17.05.2020 | 142 824 (+3 855) | 1 503 (+71) | 27 490 |
| 16.05.2020 | 138 969 (+3 505) | 1 432 (+74) | 26 032 |
| 15.05.2020 | 135 464 (+4 748) | 1 358 (+68) | 24 562 |
| 14.05.2020 | 130 716 (+4 712) | 1 290 (+58) | 23 327 |
| 13.05.2020 | 126 004 (+4 703) | 1 232 (+53) | 21 506 |
| 12.05.2020 | 121 301 (+5 392) | 1 179 (+55) | 19 642 |
| 11.05.2020 | 115 909 (+6 169) | 1 124 (+56) | 17 822 |
| 10.05.2020 | 109 740 (+5 551) | 1 068 (+58) | 13 790 |
| 09.05.2020 | 104 189 (+5 667) | 1 010 (+54) | 12 779 |
| 08.05.2020 | 98 522 (+5 846)  | 956 (+51)   | 10 259 |
| 07.05.2020 | 92 676 (+6 703)  | 905 (+39)   | 9 227  |
| 06.05.2020 | 85 973 (+5 858)  | 866 (+50)   | 8 458  |
| 05.05.2020 | 80 115 (+5 714)  | 816 (+52)   | 7 870  |
| 04.05.2020 | 74 401 (+5 795)  | 764 (+35)   | 7 573  |
| 03.05.2020 | 68 606 (+5 948)  | 729 (+34)   | 7 029  |
| 02.05.2020 | 62 658 (+5 358)  | 695 (+37)   | 6 374  |
| 01.05.2020 | 57 300 (+3 561)  | 658 (+47)   | 5 766  |
| 30.04.2020 | 53 739 (+3 093)  | 611 (+65)   | 5 135  |
| 29.04.2020 | 50 646 (+2 220)  | 546 (+67)   | 4 610  |
| 28.04.2020 | 48 426 (+3 075)  | 479 (+44)   | 4 130  |
| 27.04.2020 | 45 351 (+2 871)  | 435 (+31)   | 3 524  |
| 26.04.2020 | 42 480 (+2 971)  | 404 (+38)   | 3 175  |
| 25.04.2020 | 39 509 (+2 612)  | 366 (+41)   | 3 047  |
| 24.04.2020 | 36 897 (+2 957)  | 325 (+37)   | 2 735  |
| 23.04.2020 | 33 940 (+1 959)  | 288 (+27)   | 2 448  |

|            |                 |           |       |
|------------|-----------------|-----------|-------|
| 22.04.2020 | 31 981 (+2 548) | 261 (+28) | 2 267 |
| 21.04.2020 | 29 433 (+3 083) | 233 (+29) | 2 057 |
| 20.04.2020 | 26 350 (+2 026) | 204 (+28) | 1 838 |
| 19.04.2020 | 24 324 (+3 570) | 176 (+28) | 1 763 |
| 18.04.2020 | 20 754 (+2 649) | 148 (+21) | 1 679 |
| 17.04.2020 | 18 105 (+1 959) | 127 (+14) | 1 517 |
| 16.04.2020 | 16 146 (+1 370) | 113 (+7)  | 1 394 |
| 15.04.2020 | 14 776 (+1 774) | 106 (+11) | 1 205 |
| 14.04.2020 | 13 002 (+1 489) | 95 (+13)  | 1 016 |
| 13.04.2020 | 11 513 (+1 355) | 82 (+10)  | 837   |
| 12.04.2020 | 10 158 (+1 306) | 72 (+14)  | 687   |
| 11.04.2020 | 8 852 (+1 030)  | 58 (+8)   | 499   |
| 10.04.2020 | 7 822 (+1 124)  | 50 (+12)  | 350   |
| 09.04.2020 | 6 698 (+857)    | 38 (+7)   | 313   |
| 08.04.2020 | 5 841 (+660)    | 31        | 270   |
| 07.04.2020 | 5 181 (+697)    | 31 (+2)   | 222   |
| 06.04.2020 | 4 484 (+591)    | 29        | 206   |
| 05.04.2020 | 3 893 (+536)    | 29 (+2)   | 198   |
| 04.04.2020 | 3 357 (+434)    | 27 (+7)   | 194   |
| 03.04.2020 | 2 923 (+448)    | 20 (+1)   | 168   |
| 02.04.2020 | 2 475 (+595)    | 19 (+3)   | 140   |
| 01.04.2020 | 1 880 (+267)    | 16 (+5)   | 115   |
| 31.03.2020 | 1 613 (+387)    | 11 (+5)   | 70    |
| 30.03.2020 | 1 226 (+212)    | 6         | 28    |
| 29.03.2020 | 1 014 (+197)    | 6 (+2)    | 28    |
| 28.03.2020 | 817 (+114)      | 4 (+1)    | 18    |
| 27.03.2020 | 703 (+157)      | 3 (+1)    | 18    |
| 26.03.2020 | 546 (+136)      | 2         | 15    |
| 25.03.2020 | 410 (+120)      | 2 (+2)    | 15    |
| 24.03.2020 | 290 (+28)       | 0         | 9     |
| 23.03.2020 | 262 (+71)       | 0         | 9     |
| 22.03.2020 | 191 (+54)       | 0         | 8     |
| 21.03.2020 | 137 (+6)        | 0         | 8     |
| 20.03.2020 | 131 (+33)       | 0         | 5     |
| 19.03.2020 | 98 (+12)        | 0         | 5     |
| 18.03.2020 | 86 (+30)        | 0         | 1     |
| 17.03.2020 | 56 (+3)         | 0         | 1     |
| 16.03.2020 | 53 (+20)        | 0         | 1     |
| 15.03.2020 | 33              | 0         | 1     |

---

|            |         |   |   |
|------------|---------|---|---|
| 14.03.2020 | 33 (+9) | 0 | 1 |
| 13.03.2020 | 24 (+5) | 0 | 1 |
| 12.03.2020 | 19 (+4) | 0 | 1 |
| 11.03.2020 | 15 (+6) | 0 | 1 |
| 10.03.2020 | 9       | 0 | 1 |
| 09.03.2020 | 9 (+3)  | 0 | 1 |
| 08.03.2020 | 6       | 0 | 1 |
| 07.03.2020 | 6       | 0 | 1 |
| 06.03.2020 | 6 (+5)  | 0 | 0 |
| 05.03.2020 | 1       | 0 | 0 |
| 04.03.2020 | 1       | 0 | 0 |
| 03.03.2020 | 1       | 0 | 0 |
| 02.03.2020 | 1       | 0 | 0 |
